# Supplementary material for: Dcp2 C-terminal cis-binding elements control selective targeting of the decapping enzyme by forming distinct decapping complexes
Source: eLife. 2022 May 23;11:e74410. doi: 10.7554/eLife.74410 (PMC9170289; doi:10.7554/eLife.74410)
Supplement: Supplementary file 1. [file elife-74410-supp1.xlsx]

## Sheet: Sheet1
Supplementary file 1. Yeast strains used in this study
Strain	Genotype	Reference
HFY114(W303)	MATa ade2-1 his3-11,15 leu2-3,112 trp1-1 ura3-1 can1-100	He et al., 1997
HFY871	MATa ade2-1 his3-11,15 leu2-3,112 trp1-1 ura3-1 can1-100 upf1::HIS3	He et al., 1997
CFY25	MATa ade2-1 his3-11,15 leu2-3,112 trp1-1 ura3-1 can1-100 edc3::URA3	He and Jacobson, 2015
SYY2674	MATa ade2-1 his3-11,15 leu2-3,112 trp1-1 ura3-1 can1-100 pat1::KanMX6	He and Jacobson, 2015
SYY2680	MATa ade2-1 his3-11,15 leu2-3,112 trp1-1 ura3-1 can1-100 lsm1::KanMX6	He and Jacobson, 2015
SYY2686	MATa ade2-1 his3-11,15 leu2-3,112 trp1-1 ura3-1 can1-100 dhh1::KanMX6	He and Jacobson, 2015
SYY2990	MATa ade2-1 his3-11,15 leu2-3,112 trp1-1 ura3-1 can1-100 HA-DCP2-KanMX6	This study
SYY3013	MATa ade2-1 his3-11,15 leu2-3,112 trp1-1 ura3-1 can1-100 HA-dcp2-E3D-KanMX6	This study
SYY3016	MATa ade2-1 his3-11,15 leu2-3,112 trp1-1 ura3-1 can1-100 HA-dcp2-ID-KanMX6	This study
SYY3019	MATa ade2-1 his3-11,15 leu2-3,112 trp1-1 ura3-1 can1-100 HA-dcp2-U1D1-KanMX6	This study
SYY3022	MATa ade2-1 his3-11,15 leu2-3,112 trp1-1 ura3-1 can1-100 HA-dcp2-U1D2-KanMX6	This study
SYY3025	MATa ade2-1 his3-11,15 leu2-3,112 trp1-1 ura3-1 can1-100 HA-dcp2-E3D-ID-KanMX6	This study
SYY3028	MATa ade2-1 his3-11,15 leu2-3,112 trp1-1 ura3-1 can1-100 HA-dcp2-E3D-U1D1-KanMX6	This study
SYY3031	MATa ade2-1 his3-11,15 leu2-3,112 trp1-1 ura3-1 can1-100 HA-dcp2-E3D-U1D2-KanMX6	This study
SYY3034	MATa ade2-1 his3-11,15 leu2-3,112 trp1-1 ura3-1 can1-100 HA-dcp2-ID-U1D1-KanMX6	This study
SYY3037	MATa ade2-1 his3-11,15 leu2-3,112 trp1-1 ura3-1 can1-100 HA-dcp2-ID-U1D2-KanMX6	This study
SYY3040	MATa ade2-1 his3-11,15 leu2-3,112 trp1-1 ura3-1 can1-100 HA-dcp2-U1D1-U1D2-KanMX6	This study
SYY3043	MATa ade2-1 his3-11,15 leu2-3,112 trp1-1 ura3-1 can1-100 HA-dcp2-E3D-ID-U1D1-KanMX6	This study
SYY3046	MATa ade2-1 his3-11,15 leu2-3,112 trp1-1 ura3-1 can1-100 HA-dcp2-E3D-ID-U1D2-KanMX6	This study
SYY3049	MATa ade2-1 his3-11,15 leu2-3,112 trp1-1 ura3-1 can1-100 HA-dcp2-E3D-U1D1-U1D2-KanMX6	This study
SYY3052	MATa ade2-1 his3-11,15 leu2-3,112 trp1-1 ura3-1 can1-100 HA-dcp2-ID-U1D1-U1D2-KanMX6	This study
SYY3055	MATa ade2-1 his3-11,15 leu2-3,112 trp1-1 ura3-1 can1-100 HA-dcp2-E3D-ID-U1D1-U1D2-KanMX6	This study
SYY3097	MATa ade2-1 his3-11,15 leu2-3,112 trp1-1 ura3-1 can1-100 HA-dcp2-LD1-KanMX6	This study
SYY3100	MATa ade2-1 his3-11,15 leu2-3,112 trp1-1 ura3-1 can1-100 HA-dcp2-LD1-2-KanMX6	This study
SYY3103	MATa ade2-1 his3-11,15 leu2-3,112 trp1-1 ura3-1 can1-100 HA-dcp2-LD1-3-KanMX6	This study
SYY3106	MATa ade2-1 his3-11,15 leu2-3,112 trp1-1 ura3-1 can1-100 HA-dcp2-LD1-4-KanMX6	This study
SYY3109	MATa ade2-1 his3-11,15 leu2-3,112 trp1-1 ura3-1 can1-100 HA-dcp2-LD1-5-KanMX6	This study
SYY3112	MATa ade2-1 his3-11,15 leu2-3,112 trp1-1 ura3-1 can1-100 HA-dcp2-LD1-6-KanMX6	This study
SYY3115	MATa ade2-1 his3-11,15 leu2-3,112 trp1-1 ura3-1 can1-100 HA-dcp2-LD1-7-KanMX6	This study
SYY3118	MATa ade2-1 his3-11,15 leu2-3,112 trp1-1 ura3-1 can1-100 HA-dcp2-LD1-8-KanMX6	This study
SYY3121	MATa ade2-1 his3-11,15 leu2-3,112 trp1-1 ura3-1 can1-100 HA-dcp2-LD1-9-KanMX6	This study
SYY3124	MATa ade2-1 his3-11,15 leu2-3,112 trp1-1 ura3-1 can1-100 HA-dcp2-LD3-9-KanMX6	This study
SYY3091	MATa ade2-1 his3-11,15 leu2-3,112 trp1-1 ura3-1 can1-100 HA-dcp2-E3D1-KanMX6	This study
SYY3094	MATa ade2-1 his3-11,15 leu2-3,112 trp1-1 ura3-1 can1-100 HA-dcp2-E3D2-KanMX6	This study
SYY3127	MATa ade2-1 his3-11,15 leu2-3,112 trp1-1 ura3-1 can1-100 HA-dcp2-E3D-KanMX6 edc3::URA3	This study
SYY3128	MATa ade2-1 his3-11,15 leu2-3,112 trp1-1 ura3-1 can1-100 HA-dcp2-E3D-KanMX6 edc3::URA3	This study
SYY3131	MATa ade2-1 his3-11,15 leu2-3,112 trp1-1 ura3-1 can1-100 HA-dcp2-E3D1-KanMX6 edc3::URA3	This study
SYY3132	MATa ade2-1 his3-11,15 leu2-3,112 trp1-1 ura3-1 can1-100 HA-dcp2-E3D1-KanMX6 edc3::URA3	This study
SYY3171	MATa ade2-1 his3-11,15 leu2-3,112 trp1-1 ura3-1 can1-100 HA-dcp2-E3D-LD1-8-KanMX6	This study
SYY3174	MATa ade2-1 his3-11,15 leu2-3,112 trp1-1 ura3-1 can1-100 HA-dcp2-E3D-LD1-9-KanMX6	This study
SYY3177	MATa ade2-1 his3-11,15 leu2-3,112 trp1-1 ura3-1 can1-100 HA-dcp2-E3D1-LD1-8-KanMX6	This study
SYY3180	MATa ade2-1 his3-11,15 leu2-3,112 trp1-1 ura3-1 can1-100 HA-dcp2-E3D1-LD1-9-KanMX6	This study
SYY3183	MATa ade2-1 his3-11,15 leu2-3,112 trp1-1 ura3-1 can1-100 HA-dcp2-E3D-LD9-3-KanMX6	This study
SYY3186	MATa ade2-1 his3-11,15 leu2-3,112 trp1-1 ura3-1 can1-100 HA-dcp2-E3D-LD9-2-KanMX6	This study
SYY3189	MATa ade2-1 his3-11,15 leu2-3,112 trp1-1 ura3-1 can1-100 HA-dcp2-E3D1-LD9-3-KanMX6	This study
SYY3192	MATa ade2-1 his3-11,15 leu2-3,112 trp1-1 ura3-1 can1-100 HA-dcp2-E3D1-LD-9-2-KanMX6	This study
SYY3237	MATa ade2-1 his3-11,15 leu2-3,112 trp1-1 ura3-1 can1-100 HA-dcp2-U1D1-U1D2-LD1-9-KanMX6	This study
SYY3219	MATa ade2-1 his3-11,15 leu2-3,112 trp1-1 ura3-1 can1-100 HA-dcp2-E3D-U1D2-LD1-9-KanMX6	This study
SYY3222	MATa ade2-1 his3-11,15 leu2-3,112 trp1-1 ura3-1 can1-100 HA-dcp2-E3D-U1D1-LD1-9-KanMX6	This study
SYY3225	MATa ade2-1 his3-11,15 leu2-3,112 trp1-1 ura3-1 can1-100 HA-dcp2-E3D-U1D1-U1D2-LD1-9-KanMX6	This study
SYY3228	MATa ade2-1 his3-11,15 leu2-3,112 trp1-1 ura3-1 can1-100 HA-dcp2-E3D1-U1D2-LD1-9-KanMX6	This study
SYY3231	MATa ade2-1 his3-11,15 leu2-3,112 trp1-1 ura3-1 can1-100 HA-dcp2-E3D1-U1D1-LD1-9-KanMX6	This study
SYY3234	MATa ade2-1 his3-11,15 leu2-3,112 trp1-1 ura3-1 can1-100 HA-dcp2-E3D1-U1D1-U1D2-LD1-9-KanMX6	This study
SYY3144	MATa ade2-1 his3-11,15 leu2-3,112 trp1-1 ura3-1 can1-100 HA-DCP2-KanMX6 xrn1::ADE2	This study
SYY3135	MATa ade2-1 his3-11,15 leu2-3,112 trp1-1 ura3-1 can1-100 HA-DCP2-E3D-KanMX6 xrn1::ADE2	This study
SYY3138	MATa ade2-1 his3-11,15 leu2-3,112 trp1-1 ura3-1 can1-100 HA-DCP2-E3D1-KanMX6 xrn1::ADE2	This study
SYY3141	MATa ade2-1 his3-11,15 leu2-3,112 trp1-1 ura3-1 can1-100 HA-DCP2-U1D1-U1D2-KanMX6 xrn1::ADE2	This study
SYY3158	MATa ade2-1 his3-11,15 leu2-3,112 trp1-1 ura3-1 can1-100 HA-DCP2-KanMX6 ski2::URA3	This study
SYY3149	MATa ade2-1 his3-11,15 leu2-3,112 trp1-1 ura3-1 can1-100 HA-DCP2-E3D-KanMX6 ski2::URA3	This study
SYY3152	MATa ade2-1 his3-11,15 leu2-3,112 trp1-1 ura3-1 can1-100 HA-DCP2-E3D1-KanMX6 ski2::URA3	This study
SYY3155	MATa ade2-1 his3-11,15 leu2-3,112 trp1-1 ura3-1 can1-100 HA-DCP2-U1D1-U1D2-KanMX6 ski2::URA3	This study
SYY3166	MATa ade2-1 his3-11,15 leu2-3,112 trp1-1 ura3-1 can1-100 HA-DCP2-KanMX6 ski7::URA3	This study
SYY3160	MATa ade2-1 his3-11,15 leu2-3,112 trp1-1 ura3-1 can1-100 HA-DCP2-E3D-KanMX6 ski7::URA3	This study
SYY3163	MATa ade2-1 his3-11,15 leu2-3,112 trp1-1 ura3-1 can1-100 HA-DCP2-E3D1-KanMX6 ski7::URA3	This study
SYY3169	MATa ade2-1 his3-11,15 leu2-3,112 trp1-1 ura3-1 can1-100 HA-DCP2-U1D1-U1D2-KanMX6 ski7::URA3	This study
SYY3195	MATa ade2-1 his3-11,15 leu2-3,112 trp1-1 ura3-1 can1-100 HA-dcp2-LD1-9-KanMX6 xrn1::ADE2	This study
SYY3198	MATa ade2-1 his3-11,15 leu2-3,112 trp1-1 ura3-1 can1-100 HA-dcp2-LD1-9-KanMX6 ski2::URA3	This study
SYY3201	MATa ade2-1 his3-11,15 leu2-3,112 trp1-1 ura3-1 can1-100 HA-dcp2-LD1-9-KanMX6 ski7::URA3	This study
GGY1::171	his3 leu2 URA3::GAL1-lacZ gal4Δ gal80Δ	He and Jacobson, 2015
SYY2390	his3 leu2 URA3::GAL1-lacZ gal4Δ gal80Δ dcp2-N245::KanMX6	He and Jacobson, 2015
SYY1774	his3 leu2 URA3::GAL1-lacZ gal4Δ gal80Δ edc3::KanMX6	He and Jacobson, 2015
SYY2451	his3 leu2 URA3::GAL1-lacZ gal4Δ gal80Δ pat1::KanMX6	He and Jacobson, 2015
SYY2467	his3 leu2 URA3::GAL1-lacZ gal4Δ gal80Δ dhh1::KanMX6	He and Jacobson, 2015
SYY2973	his3 leu2 URA3::GAL1-lacZ gal4Δ gal80Δ upf1::KanMX6	This study
SYY2976	his3 leu2 URA3::GAL1-lacZ gal4Δ gal80Δ scd6::KanMX6	This study
SYY2744	his3 leu2 URA3::GAL1-lacZ gal4Δ gal80Δ dcp2-N245::KanMX6 edc3::HygroR	This study
SYY2986	his3 leu2 URA3::GAL1-lacZ gal4Δ gal80Δ upf1::KanMX6 edc3::HygroR	This study
SYY2980	his3 leu2 URA3::GAL1-lacZ gal4Δ gal80Δ pat1::KanMX6 edc3::HygroR	This study
SYY3060	his3 leu2 URA3::GAL1-lacZ gal4Δ gal80Δ scd6::KanMX6 edc3::HygroR	This study
SYY3067	his3 leu2 URA3::GAL1-lacZ gal4Δ gal80Δ dcp2-N925-KanMX6	This study
SYY3070	his3 leu2 URA3::GAL1-lacZ gal4Δ gal80Δ dcp2-N770-KanMX6	This study
SYY3073	his3 leu2 URA3::GAL1-lacZ gal4Δ gal80Δ dcp2-N630-KanMX6	This study
SYY3075	his3 leu2 URA3::GAL1-lacZ gal4Δ gal80Δ dcp2-N475-KanMX6	This study
SYY3077	his3 leu2 URA3::GAL1-lacZ gal4Δ gal80Δ dcp2-N400-KanMX6	This study
SYY3079	his3 leu2 URA3::GAL1-lacZ gal4Δ gal80Δ dcp2-N300-KanMX6	This study
SYY3064	his3 leu2 URA3::GAL1-lacZ gal4Δ gal80Δ edc3::HygroR	This study
SYY3081	his3 leu2 URA3::GAL1-lacZ gal4Δ gal80Δ dcp2-N925-KanMX6 edc3::HygroR	This study
SYY3083	his3 leu2 URA3::GAL1-lacZ gal4Δ gal80Δ dcp2-N770-KanMX6 edc3::HygroR	This study
SYY3085	his3 leu2 URA3::GAL1-lacZ gal4Δ gal80Δ dcp2-N630-KanMX6 edc3::HygroR	This study
SYY3087	his3 leu2 URA3::GAL1-lacZ gal4Δ gal80Δ dcp2-N475-KanMX6 edc3::HygroR	This study
SYY3090	his3 leu2 URA3::GAL1-lacZ gal4Δ gal80Δ dcp2-N400-KanMX6 edc3::HygroR	This study
SYY3089	his3 leu2 URA3::GAL1-lacZ gal4Δ gal80Δ dcp2-N300-KanMX6 edc3::HygroR	This study
