# Supplementary material for: Dcp2 C-terminal cis-binding elements control selective targeting of the decapping enzyme by forming distinct decapping complexes
Source: eLife. 2022 May 23;11:e74410. doi: 10.7554/eLife.74410 (PMC9170289; doi:10.7554/eLife.74410)
Supplement: Supplementary file 2. [file elife-74410-supp2.xlsx]

## Sheet: Sheet1
Supplementary file 2. Plasmids used in this study
Name	Vector and allele	5' Restriction site(s)	3' Restriction site(s)	Description
HFE2095	Bs-ks-xrn1::ADE2	NotI	SalI	Contains the xrn1::ADE2 null allele as a NotI-SalI fragment, described previously in He et al. (2018)
HFE2289	Bs-ks-ski2::URA3	NotI	SalI	Contains the ski2::URA3 null allele as a NotI-SalI fragment, described previously He et al. (2018)
HFSE26	Bs-Ks-ski7::URA3	NotI	SalI	Contains the ski7::URA3 null allele as a NotI-SalI fragment, described previously in He et al. (2018)
HFSE1066	Bs-ks-scd6::KanMX6	NotI	SalI	Contains the scd6:: KanMX6 null allele as a NotI-SalI fragment, described previously in He et al. (2018)
HFCE7	Bs-ks-edc3::URA3	NotI	SalI	Contains the edc3::URA3 null allele as a NotI-SalI fragment, described previously in Dong et al. (2007)
HFSE1494	Bs-ks-edc3::HygroR	NotI	SalI	Contains the edc3:HygroR null allele as a NotI-SalI fragment
HFSE814	Bs-ks-upf1::KanMX6	NotI	SalI	Contains the upf1::KanMX6 null allele as a NotI-SalI fragment
HFSE709	pRS315-DCP2	XbaI	Sau3A/BamHI	Contains wild-type DCP2 as a 4.3 kb XbaI-Sau3AI fragment, described previously in He and Jacobson (2015)
HFSE732	pRS315-dcp2-N925	XbaI	Sau3A/BamHI	Same as HFSE709 but contains a deletion of 45 codons from the C-terminus, described previously in He and Jacobson (2015)
HFSE721	pRS315-dcp2-N771	XbaI	Sau3A/BamHI	Same as HFSE709 but contains a deletion of 199 codons from the C-terminus, described previously in He and Jacobson (2015)
HFSE719	pRS315-dcp2-N630	XbaI	Sau3A/BamHI	Same as HFSE709 but contains a deletion of 340 codons from the C-terminus, described previously in He and Jacobson (2015)
HFSE731	pRS315-dcp2-N475	XbaI	Sau3A/BamHI	Same as HFSE709 but contains a deletion of 495 codons from the C-terminus, described previously in He and Jacobson (2015)
HFSE1376	pRS315-dcp2-N400	XbaI	Sau3A/BamHI	Same as HFSE1076 but contains a deletion of 570 codons from the C-terminus, described previously in He and Jacobson (2015)
HFSE729	pRS315-dcp2-N300	XbaI	Sau3A/BamHI	Same as HFSE709 but contains a deletion of 670 codons from the C-terminus, described previously in He and Jacobson (2015)
HFSE1520	pRS315-HA-DCP2	XbaI	Sau3A/BamHI	Same as HFSE709 but contains a triple HA tag at the N-terminus, described previously in He and Jacobson (2015)
HFSE1624	pRS315-HA-dcp2-E153Q-N245	XbaI	SalI	Contains an N-terminal triple HA-tagged dcp2-E153Q-N245 allele as a 2.1kb XbaI-SalI fragment, described previously in He et al. (2018)
HFSE1638	pRS315-HA-DCP2-WT-M1	XbaI	BglII-NotI-SalI/XhoI	Contains the N-terminal triple HA-tagged wild-type DCP2 allele as a 4.3 kb XbaI-BglII fragment, constructed by ligating the BamHI-NcoI DCP2 fragment from HFSE1520 and a PCR amplyfied 3'-UTR NcoI-SalI fragment to HFSE1624 digested by BamHI-XhoI
HFSE1632	pRS315-DCP2-WT-M1	XbaI	BamHI-NotI-SalI/XhoI	contains the wild-type DCP2 allele as a 4.2 kb XbaI-BamHI fragment, constructed by ligating the XbaI-NcoI DCP2 fragment from HFSE709 and a PCR amplified 3'-UTR NcoI-SalI fragment to pRS315 digested by XbaI-XhoI
HFSE1813	pRS315-dcp2-N925-M1	XbaI	BamHI-NotI-SalI/XhoI	same as HFSE1632 but contains a C-terminal 45-codon deletion of DCP2, constructed by ligating the SalI-NcoI dcp2 fragment from HFSE732 to HFSE1632 digested by SalI-NcoI
HFSE1815	pRS315-dcp2-N770-M1	XbaI	BamHI-NotI-SalI/XhoI	same as HFSE1632 but contains a C-terminal 200-codon acid deletion of DCP2, constructed by ligating the SalI-NcoI dcp2 fragment from HFSE721 to HFSE1632 digested by SalI-NcoI
HFSE1817	pRS315-dcp2-N630-M1	XbaI	BamHI-NotI-SalI/XhoI	same as HFSE1632 but contains a C-terminal 340-codon acid deletion of DCP2, constructed by ligating the SalI-NcoI dcp2 fragment from HFSE719 to HFSE1632 digested by SalI-NcoI
HFSE1819	pRS315-dcp2-N475-M1	XbaI	BamHI-NotI-SalI/XhoI	same as HFSE1632 but contains a C-terminal 495-codon deletion of DCP2, constructed by ligating the SalI-NcoI dcp2 fragment from HFSE731 to HFSE1632 digested by SalI-NcoI
HFSE1821	pRS315-dcp2-N400-M1	XbaI	BamHI-NotI-SalI/XhoI	same as HFSE1632 but contains a C-terminal 570-codon deletion of DCP2, constructed by ligating the SalI-NcoI dcp2 fragment from HFSE1376 to HFSE1632 digested by SalI-NcoI
HFSE1823	pRS315-dcp2-N300-M1	XbaI	BamHI-NotI-SalI/XhoI	same as HFSE1632 butcontains a C-terminal 670-codon deletion of DCP2, constructed by ligating the SalI-NcoI dcp2 fragment from HFSE729 to HFSE1632 digested by SalI-NcoI
HFSE1147	Bs-Ks-dcp2-N245-KanMX6	NotI-XbaI	XhoI	contains the dcp2-N245-KanMX6 allele as a 3.5 Kb XbaI-XhoI fragment, described previously in He and Jacobson (2015)
HFSE1636	Bs-ks-dcp2-N245-KanMX6-M1	NotI-XbaI	BamHI-NotI-SalI/XhoI	contains the dcp2-N245-KanMX6 allele as a 3.5 Kb NotI-NotI fragment, constructed by ligating a KanMX6-DCP2 HindIII-NcoI fragment isolated form HFSE1147 and a PCR-amplified DCP2 3'-UTR NcoI-SalI fragment to HFSE1147 digested by HindIII-XhoI
HFSE1825	Bs-ks-dcp2-N925-KanMX6	NotI-XbaI	BamHI-NotI-SalI/XhoI	constructed by ligating the SaII-BamHI dcp2 fragment from HSE1813 to HFSE1636 digested by SalI-BamHI
HFSE1827	Bs-ks-dcp2-N770-KanMX6	NotI-XbaI	BamHI-NotI-SalI/XhoI	constructed by ligating the SaII-BamHI dcp2 fragment from HSE1815 to HFSE1636 digested by SalI-BamHI
HFSE1829	Bs-ks-dcp2-N630-KanMX6	NotI-XbaI	BamHI-NotI-SalI/XhoI	constructed by ligating the SaII-BamHI dcp2 fragment from HSE1817 to HFSE1636 digested by SalI-BamHI
HFSE1831	Bs-ks-dcp2-N4725-KanMX6	NotI-XbaI	BamHI-NotI-SalI/XhoI	constructed by ligating the SaII-BamHI dcp2 fragment from HSE1819 to HFSE1636 digested by SalI-BamHI
HFSE1833	Bs-ks-dcp2-N400-KanMX6	NotI-XbaI	BamHI-NotI-SalI/XhoI	constructed by ligating the SaII-BamHI dcp2 fragment from HSE1821 to HFSE1636 digested by SalI-BamHI
HFSE1835	Bs-ks-dcp2-N300-KanMX6	NotI-XbaI	BamHI-NotI-SalI/XhoI	constructed by ligating the SaII-BamHI dcp2 fragment from HSE1823 to HFSE1636 digested by SalI-BamHI
HFSE1643	Bs-ks-HA-DCP2-WT-KanMX6	NotI-XbaI	BglII/BamHI-NotI-SalI/XhoI	constructed by ligating the SaII-BglII DCP2 fragment from HSE1638 to HFSE1636 digested by SalI-BamHI
HFSE1660	Bs-ks-HA-dcp2-E3D-KanMX6	NotI-XbaI	BglII/BamHI-NotI-SalI/XhoI	constructed by ligating the SaII-BglII dcp2 fragment from HSE1647 to HFSE1636 digested by SalI-BamHI
HFSE1663	Bs-ks-HA-dcp2-U1D1-KanMX6	NotI-XbaI	BglII/BamHI-NotI-SalI/XhoI	constructed by ligating the SaII-BglII dcp2 fragment from HSE1648 to HFSE1636 digested by SalI-BamHI
HFSE1678	Bs-ks-HA-dcp2-U1D2-KanMX6	NotI-XbaI	BglII/BamHI-NotI-SalI/XhoI	constructed by ligating the SaII-BglII dcp2 fragment from HSE1651 to HFSE1636 digested by SalI-BamHI
HFSE1681	Bs-ks-HA-dcp2-ID-KanMX6	NotI-XbaI	BglII/BamHI-NotI-SalI/XhoI	constructed by ligating the SaII-BglII dcp2 fragment from HSE1668 to HFSE1636 digested by SalI-BamHI
HFSE1683	Bs-ks-HA-dcp2-ID-U1D1-KanMX6	NotI-XbaI	BglII/BamHI-NotI-SalI/XhoI	constructed by ligating the SaII-BglII dcp2 fragment from HSE1671 to HFSE1636 digested by SalI-BamHI
HFSE1684	Bs-ks-HA-dcp2-ID-U1D2-KanMX6	NotI-XbaI	BglII/BamHI-NotI-SalI/XhoI	constructed by ligating the SaII-BglII dcp2 fragment from HSE1674 to HFSE1636 digested by SalI-BamHI
HFSE1687	Bs-ks-HA-dcp2-U1D1-U1D2-KanMX6	NotI-XbaI	BglII/BamHI-NotI-SalI/XhoI	constructed by ligating the SaII-BglII dcp2 fragment from HSE1677 to HFSE1636 digested by SalI-BamHI
HFSE1688	Bs-ks-HA-dcp2-E3D-U1D1-KanMX6	NotI-XbaI	BglII/BamHI-NotI-SalI/XhoI	constructed by ligating the SaII-BglII dcp2 fragment from HSE1654 to HFSE1636 digested by SalI-BamHI
HFSE1690	Bs-ks-HA-dcp2-E3D-U1D2-KanMX6	NotI-XbaI	BglII/BamHI-NotI-SalI/XhoI	constructed by ligating the SaII-BglII dcp2 fragment from HSE1657 to HFSE1636 digested by SalI-BamHI
HFSE1702	Bs-ks-HA-dcp2-E3D-ID-KanMX6	NotI-XbaI	BglII/BamHI-NotI-SalI/XhoI	constructed by ligating the SaII-BglII dcp2 fragment from HSE1692 to HFSE1636 digested by SalI-BamHI
HFSE1704	Bs-ks-HA-dcp2-E3D-ID-U1D1-KanMX6	NotI-XbaI	BglII/BamHI-NotI-SalI/XhoI	constructed by ligating the SaII-BglII dcp2 fragment from HSE1695 to HFSE1636 digested by SalI-BamHI
HFSE1706	Bs-ks-HA-dcp2-E3D-ID-U1D2-KanMX6	NotI-XbaI	BglII/BamHI-NotI-SalI/XhoI	constructed by ligating the SaII-BglII dcp2 fragment from HSE1697 to HFSE1636 digested by SalI-BamHI
HFSE1708	Bs-ks-HA-dcp2-E3D-U1D1-U1D2-KanMX6	NotI-XbaI	BglII/BamHI-NotI-SalI/XhoI	constructed by ligating the SaII-BglII dcp2 fragment from HSE1698 to HFSE1636 digested by SalI-BamHI
HFSE1711	Bs-ks-HA-dcp2-ID-U1D1-U1D2-KanMX6	NotI-XbaI	BglII/BamHI-NotI-SalI/XhoI	constructed by ligating the SaIIBglII dcp2 fragment from HSE1700 to HFSE1636 digested by SalI-BamHI
HFSE1715	Bs-ks-HA-dcp2-E3D-ID-U1D1-U1D2-KanMX6	NotI-XbaI	BglII/BamHI-NotI-SalI/XhoI	constructed by ligating the SaII-BglII dcp2 fragment from HSE1713 to HFSE1636 digested by SalI-BamHI
HFSE1862	Bs-ks-HA-dcp2-E3D1-KanMX6	NotI-XbaI	BglII/BamHI-NotI-SalI/XhoI	constructed by ligating the SaII-BglII dcp2 fragment from HSE1842 to HFSE1636 digested by SalI-BamHI
HFSE1864	Bs-ks-HA-dcp2-E3D2-KanMX6	NotI-XbaI	BglII/BamHI-NotI-SalI/XhoI	constructed by ligating the SaII-BglII dcp2 fragment from HSE1843 to HFSE1636 digested by SalI-BamHI
HFSE1866	Bs-ks-HA-dcp2-LD1-KanMX6	NotI-XbaI	BglII/BamHI-NotI-SalI/XhoI	constructed by ligating the SaII-BglII dcp2 fragment from HSE1844 to HFSE1636 digested by SalI-BamHI
HFSE1868	Bs-ks-HA-dcp2-LD1-2-KanMX6	NotI-XbaI	BglII/BamHI-NotI-SalI/XhoI	constructed by ligating the SaII-BglII dcp2 fragment from HSE1850 to HFSE1636 digested by SalI-BamHI
HFSE1872	Bs-ks-HA-dcp2-LD1-3-KanMX6	NotI-XbaI	BglII/BamHI-NotI-SalI/XhoI	constructed by ligating the SaII-BglII dcp2 fragment from HSE1856 to HFSE1636 digested by SalI-BamHI
HFSE1874	Bs-ks-HA-dcp2-LD1-4-KanMX6	NotI-XbaI	BglII/BamHI-NotI-SalI/XhoI	constructed by ligating the SaII-BglII dcp2 fragment from HSE1858 to HFSE1636 digested by SalI-BamHI
HFSE1885	Bs-ks-HA-dcp2-LD1-5-KanMX6	NotI-XbaI	BglII/BamHI-NotI-SalI/XhoI	constructed by ligating the SaII-BglII dcp2 fragment from HSE1860 to HFSE1636 digested by SalI-BamHI
HFSE1887	Bs-ks-HA-dcp2-LD1-6-KanMX6	NotI-XbaI	BglII/BamHI-NotI-SalI/XhoI	constructed by ligating the SaII-BglII dcp2 fragment from HSE1878 to HFSE1636 digested by SalI-BamHI
HFSE1889	Bs-ks-HA-dcp2-LD1-7-KanMX6	NotI-XbaI	BglII/BamHI-NotI-SalI/XhoI	constructed by ligating the SaII-BglII dcp2 fragment from HSE1880 to HFSE1636 digested by SalI-BamHI
HFSE1922	Bs-ks-HA-dcp2-LD1-8-KanMX6	NotI-XbaI	BglII/BamHI-NotI-SalI/XhoI	constructed by ligating the SaII-BglII dcp2 fragment from HSE1912 to HFSE1636 digested by SalI-BamHI
HFSE1924	Bs-ks-HA-dcp2-LD1-9-KanMX6	NotI-XbaI	BglII/BamHI-NotI-SalI/XhoI	constructed by ligating the SaII-BglII dcp2 fragment from HSE1914 to HFSE1636 digested by SalI-BamHI
HFSE1927	Bs-ks-HA-dcp2-LD3-9-KanMX6	NotI-XbaI	BglII/BamHI-NotI-SalI/XhoI	constructed by ligating the SaII-BglII dcp2 fragment from HSE1910 to HFSE1636 digested by SalI-BamHI
HFSE2040	Bs-ks-HA-dcp2-LD9-KanMX6	NotI-XbaI	BglII/BamHI-NotI-SalI/XhoI	constructed by ligating the SaII-BglII dcp2 fragment from HSE1976 to HFSE1636 digested by SalI-BamHI
HFSE2042	Bs-ks-HA-dcp2-LD9-8-KanMX6	NotI-XbaI	BglII/BamHI-NotI-SalI/XhoI	constructed by ligating the SaII-BglII dcp2 fragment from HSE1978 to HFSE1636 digested by SalI-BamHI
HFSE2054	Bs-ks-HA-dcp2-LD9-7-KanMX6	NotI-XbaI	BglII/BamHI-NotI-SalI/XhoI	constructed by ligating the SaII-BglII dcp2 fragment from HSE1980 to HFSE1636 digested by SalI-BamHI
HFSE2052	Bs-ks-HA-dcp2-LD9-6-KanMX6	NotI-XbaI	BglII/BamHI-NotI-SalI/XhoI	constructed by ligating the SaII-BglII dcp2 fragment from HSE1982 to HFSE1636 digested by SalI-BamHI
HFSE2044	Bs-ks-HA-dcp2-LD9-5-KanMX6	NotI-XbaI	BglII/BamHI-NotI-SalI/XhoI	constructed by ligating the SaII-BglII dcp2 fragment from HSE1984 to HFSE1636 digested by SalI-BamHI
HFSE2046	Bs-ks-HA-dcp2-LD9-4-KanMX6	NotI-XbaI	BglII/BamHI-NotI-SalI/XhoI	constructed by ligating the SaII-BglII dcp2 fragment from HSE1986 to HFSE1636 digested by SalI-BamHI
HFSE2048	Bs-ks-HA-dcp2-LD9-3-KanMX6	NotI-XbaI	BglII/BamHI-NotI-SalI/XhoI	constructed by ligating the SaII-BglII dcp2 fragment from HSE1989 to HFSE1636 digested by SalI-BamHI
HFSE2050	Bs-ks-HA-dcp2-LD9-2-KanMX6	NotI-XbaI	BglII/BamHI-NotI-SalI/XhoI	constructed by ligating the SaII-BglII dcp2 fragment from HSE1990 to HFSE1636 digested by SalI-BamHI
HFSE2092	Bs-ks-HA-dcp2-E3D-LD1-8-KanMX6	NotI-XbaI	BglII/BamHI-NotI-SalI/XhoI	constructed by ligating the SaII-BglII dcp2 fragment from HSE2077 to HFSE1636 digested by SalI-BamHI
HFSE2094	Bs-ks-HA-dcp2-E3D-LD1-9-KanMX6	NotI-XbaI	BglII/BamHI-NotI-SalI/XhoI	constructed by ligating the SaII-BglII dcp2 fragment from HSE2078 to HFSE1636 digested by SalI-BamHI
HFSE2096	Bs-ks-HA-dcp2-E3D-LD9-3-KanMX6	NotI-XbaI	BglII/BamHI-NotI-SalI/XhoI	constructed by ligating the SaII-BglII dcp2 fragment from HSE2081 to HFSE1636 digested by SalI-BamHI
HFSE2098	Bs-ks-HA-dcp2-E3D-LD9-2-KanMX6	NotI-XbaI	BglII/BamHI-NotI-SalI/XhoI	constructed by ligating the SaII-BglII dcp2 fragment from HSE2083 to HFSE1636 digested by SalI-BamHI
HFSE2100	Bs-ks-HA-dcp2-E3D1-LD1-8-KanMX6	NotI-XbaI	BglII/BamHI-NotI-SalI/XhoI	constructed by ligating the SaII-BglII dcp2 fragment from HSE2084 to HFSE1636 digested by SalI-BamHI
HFSE2102	Bs-ks-HA-dcp2-E3D1-LD1-9-KanMX6	NotI-XbaI	BglII/BamHI-NotI-SalI/XhoI	constructed by ligating the SaII-BglII dcp2 fragment from HSE2086 to HFSE1636 digested by SalI-BamHI
HFSE2104	Bs-ks-HA-dcp2-E3D1-LD9-3-KanMX6	NotI-XbaI	BglII/BamHI-NotI-SalI/XhoI	constructed by ligating the SaII-BglII dcp2 fragment from HSE2089 to HFSE1636 digested by SalI-BamHI
HFSE2106	Bs-ks-HA-dcp2-E3D1-LD9-2-KanMX6	NotI-XbaI	BglII/BamHI-NotI-SalI/XhoI	constructed by ligating the SaII-BglII dcp2 fragment from HSE2091 to HFSE1636 digested by SalI-BamHI
HFSE2207	Bs-ks-HA-dcp2-U1D1-LD1-9-KanMX6	NotI-XbaI	BglII/BamHI-NotI-SalI/XhoI	constructed by ligating the SaII-BglII dcp2 fragment from HSE2157 to HFSE1636 digested by SalI-BamHI
HFSE2209	Bs-ks-HA-dcp2-U1D2-LD1-9-KanMX6	NotI-XbaI	BglII/BamHI-NotI-SalI/XhoI	constructed by ligating the SaII-BglII dcp2 fragment from HSE2158 to HFSE1636 digested by SalI-BamHI
HFSE2186	Bs-ks-HA-dcp2-U1D1-U1D2-LD1-9-KanMX6	NotI-XbaI	BglII/BamHI-NotI-SalI/XhoI	constructed by ligating the SaII-BglII dcp2 fragment from HFSE2161 to HFSE1636 digested by SalI-BamHI
HFSE2174	Bs-ks-HA-dcp2-E3D-U1D1-LD1-9-KanMX6	NotI-XbaI	BglII/BamHI-NotI-SalI/XhoI	constructed by ligating the SaII-BglII dcp2 fragment from HFSE2162 to HFSE1636 digested by SalI-BamHI
HFSE2176	Bs-ks-HA-dcp2-E3D-U1D2-LD1-9-KanMX6	NotI-XbaI	BglII/BamHI-NotI-SalI/XhoI	constructed by ligating the SaII-BglII dcp2 fragment from HFSE2164 to HFSE1636 digested by SalI-BamHI
HFSE2178	Bs-ks-HA-dcp2-E3D-U1D1-U1D2-LD1-9-KanMX6	NotI-XbaI	BglII/BamHI-NotI-SalI/XhoI	constructed by ligating the SaII-BglII dcp2 fragment from HFSE2166 to HFSE1636 digested by SalI-BamHI
HFSE2180	Bs-ks-HA-dcp2-E3D1-U1D1-LD1-9-KanMX6	NotI-XbaI	BglII/BamHI-NotI-SalI/XhoI	constructed by ligating the SaII-BglII dcp2 fragment from HFSE2168 to HFSE1636 digested by SalI-BamHI
HFSE2182	Bs-ks-HA-dcp2-E3D1-U1D2-LD1-9-KanMX6	NotI-XbaI	BglII/BamHI-NotI-SalI/XhoI	constructed by ligating the SaII-BglII dcp2 fragment from HFSE2170 to HFSE1636 digested by SalI-BamHI
HFSE2184	Bs-ks-HA-dcp2-E3D1-U1D1-U1D2-LD1-9-KanMX6	NotI-XbaI	BglII/BamHI-NotI-SalI/XhoI	constructed by ligating the SaII-BglII dcp2 fragment from HFSE2172 to HFSE1636 digested by SalI-BamHI
HFSE1645	Bs-ks-HA-DCP2-WT-M1(S-N)	SalI	BglII-NotI	constructed by ligating the SalI-NotI HA-DCP2 fragment from HFSE1638 to Bs-ks digested by SalI-NotI
HFSE1647	Bs-ks-HA-dcp2-E3D(S-N)	SalI	BglII-NotI	constructed by site-directed mutagesis using the plasmid HFSE1645 as template and the oligonucleotides DCP2-E3D2-F/DCP2-E3D-R as PCR primers
HFSE1668	Bs-ks-HA-dcp2-ID(S-N)	SalI	BglII-NotI	constructed by site-directed mutagesis using the plasmid HFSE1645 as template and the oligonucleotides DCP2-ID-F/DCP2-ID-R as PCR primers
HFSE1648	Bs-ks-HA-dcp2-U1D1(S-N)	SalI	BglII-NotI	constructed by site-directed mutagesis using the plasmid HFSE1645 as template and the oligonucleotides DCP2-U1D-F1/DCP2-U1D-R1 as PCR primers
HFSE1651	Bs-ks-HA-dcp2-U1D2(S-N)	SalI	BglII-NotI	constructed by site-directed mutagesis using the plasmid HFSE1645 as template and the oligonucleotides DCP2-U1D-F2/DCP2-U1D-R2 as PCR primers
HFSE1671	Bs-ks-HA-dcp2-ID-U1D1(S-N)	SalI	BglII-NotI	constructed by site-directed mutagesis using the plasmid HFSE1648 as template and the oligonucleotides DCP2-ID-F/DCP2-ID-R as PCR primers
HFSE1674	Bs-ks-HA-dcp2-ID-U1D2(S-N)	SalI	BglII-NotI	constructed by site-directed mutagesis using the plasmid HFSE1651 as template and the oligonucleotides DCP2-ID-F/DCP2-ID-R as PCR primers
HFSE1677	Bs-ks-HA-dcp2-U1D1-U1D2(S-N)	SalI	BglII-NotI	constructed by site-directed mutagesis using the plasmid HFSE1648 as template and the oligonucleotides DCP2-U1D-F2/DCP2-U1D-R2 as PCR primers
HFSE1700	Bs-ks-HA-dcp2-ID-U1D1-U1D2(S-N)	SalI	BglII-NotI	constructed by site-directed mutagesis using the plasmid HFSE1677 as template and the oligonucleotides DCP2-ID-F/DCP2-ID-R as PCR primers
HFSE1654	Bs-ks-HA-dcp2-E3D-U1D1(S-N)	SalI	BglII-NotI	constructed by ligating the 5' NheI-XhoI dcp2 fragment from HFSE1647 and the 3' XhoI-NotI dcp2 fragment from HFSE1648 to HFSE1645 digested by NheI-NotI
HFSE1657	Bs-ks-HA-dcp2-E3D-U1D2(S-N)	SalI	BglII-NotI	constructed by ligating the 5' NheI-XhoI dcp2 fragment from HFSE1647 and the 3' XhoI-NotI dcp2 fragment from HFSE1651 to HFSE1645 digested by NheI-NotI
HFSE1692	Bs-ks-HA-dcp2-E3D-ID(S-N)	SalI	BglII-NotI	constructed by ligating the 5' NheI-XhoI dcp2 fragment from HFSE1647 and the 3' XhoI-NotI dcp2 fragment from HFSE1668 to HFSE1645 digested by NheI-NotI
HFSE1695	Bs-ks-HA-dcp2-E3D-ID-U1D1(S-N)	SalI	BglII-NotI	constructed by ligating the 5' NheI-XhoI dcp2 fragment from HFSE1647 and the 3' XhoI-NotI dcp2 fragment from HFSE1671 to HFSE1645 digested by NheI-NotI
HFSE1697	Bs-ks-HA-dcp2-E3D-ID-U1D2(S-N)	SalI	BglII-NotI	constructed by ligating the 5' NheI-XhoI dcp2 fragment from HFSE1647 and the 3' XhoI-NotI dcp2 fragment from HFSE1674 to HFSE1645 digested by NheI-NotI
HFSE1698	Bs-ks-HA-dcp2-E3D-U1D1-U1D2(S-N)	SalI	BglII-NotI	constructed by ligating the 5' NheI-XhoI dcp2 fragment from HFSE1647 and the 3' XhoI-NotI dcp2 fragment from HFSE1677 to HFSE1645 digested by NheI-NotI
HFSE1713	Bs-ks-HA-dcp2-E3D-ID-U1D1-U1D2(S-N)	SalI	BglII-NotI	constructed by ligating the 5' NheI-XhoI dcp2 fragment from HFSE1647 and the 3' XhoI-NotI dcp2 fragment from HFSE1700 to HFSE1645 digested by NheI-NotI
HFSE1842	Bs-ks-HA-dcp2-E3D1(S-N)	SalI	BglII-NotI	constructed by site-directed mutagesis using the plasmid HFSE1645 as template and the oligonucleotides DCP2-ED1-F/DCP2-ED1-R as PCR primers
HFSE1843	Bs-ks-HA-dcp2-E3D2(S-N)	SalI	BglII-NotI	constructed by site-directed mutagesis using the plasmid HFSE1645 as template and the oligonucleotidesr DCP2-ED2-F/DCP2-ED2-R as PCR primers
HFSE1844	Bs-ks-HA-dcp2-LD1(S-N)	SalI	BglII-NotI	constructed by site-directed mutagesis using the plasmid HFSE1645 as template and the oligonucleotides DCP2-LD1-F/DCP2-LD1-R as PCR primers
HFSE1850	Bs-ks-HA-dcp2-LD1-2(S-N)	SalI	BglII-NotI	constructed by site-directed mutagesis using the plasmid HFSE1844 as template and the oligonucleotides DCP2-LD2-F/DCP2-LD2-R as PCR primers
HFSE1845	Bs-ks-HA-dcp2-LD3(S-N)	SalI	BglII-NotI	constructed by site-directed mutagesis using the plasmid HFSE1645 as template and the oligonucleotides DCP2-LD3-F/DCP2-LD3-R as PCR primers
HFSE1852	Bs-ks-HA-dcp2-LD3-4(S-N)	SalI	BglII-NotI	constructed by site-directed mutagesis using the plasmid HFSE1845 as template and the oligonucleotides DCP2-LD4-F/DCP2-LD4-R as PCR primers
HFSE1854	Bs-ks-HA-dcp2-LD3-5(S-N)	SalI	BglII-NotI	constructed by site-directed mutagesis using the plasmid HFSE1852 as template and the oligonucleotides DCP2-LD5-F/DCP2-LD5-R as PCR primers
HFSE1871	Bs-ks-HA-dcp2-LD3-6(S-N)	SalI	BglII-NotI	constructed by site-directed mutagesis using the plasmid HFSE1854 as template and the oligonucleotides DCP2-LD6-F/DCP2-LD6-R as PCR primers
HFSE1877	Bs-ks-HA-dcp2-LD3-7(S-N)	SalI	BglII-NotI	constructed by site-directed mutagesis using the plasmid HFSE1871 as template and the oligonucleotides DCP2-LD7-F/DCP2-LD7-R as PCR primers
HFSE1909	Bs-ks-HA-dcp2-LD3-8(S-N)	SalI	BglII-NotI	constructed by site-directed mutagesis using the plasmid HFSE1877 as template and the oligonucleotides DCP2-LD8-F3/DCP2-LD8-R3 as PCR primers
HFSE1882	Bs-ks-HA-dcp2-LD3-7-9(S-N)	SalI	BglII-NotI	constructed by site-directed mutagesis using the plasmid HFSE1877 as template and the oligonucleotides DCP2-LD9-F/DCP2-LD9-R as PCR primers
HFSE1910	Bs-ks-HA-dcp2-LD3-9(S-N)	SalI	BglII-NotI	constructed by site-directed mutagesis using the plasmid HFSE1882 as template and the oligonucleotides DCP2-LD8-F3/DCP2-LD8-R3 as PCR primers
HFSE1856	Bs-ks-HA-dcp2-LD1-3(S-N)	SalI	BglII-NotI	constructed by ligating the 5' NheI-NdeI dcp2 fragment from HFSE1850 and the 3' NdeI-NotI dcp2 fragment from HFSE1845 to HFSE1645 digested by NheI-NotI
HFSE1858	Bs-ks-HA-dcp2-LD1-4(S-N)	SalI	BglII-NotI	constructed by ligating the 5' NheI-NdeI dcp2 fragment from HFSE1850 and the 3' NdeI-NotI dcp2 fragment from HFSE1852 to HFSE1645 digested by NheI-NotI
HFSE1860	Bs-ks-HA-dcp2-LD1-5(S-N)	SalI	BglII-NotI	constructed by ligating the 5' NheI-NdeI dcp2 fragment from HFSE1850 and the 3' NdeI-NotI dcp2 fragment from HFSE1854 to HFSE1645 digested by NheI-NotI
HFSE1878	Bs-ks-HA-dcp2-LD1-6(S-N)	SalI	BglII-NotI	constructed by ligating the 5' NheI-NdeI dcp2 fragment from HFSE1850 and the 3' NdeI-NotI dcp2 fragment from HFSE1871 to HFSE1645 digested by NheI-NotI
HFSE1880	Bs-ks-HA-dcp2-LD1-7(S-N)	SalI	BglII-NotI	constructed by ligating the 5' NheI-NdeI dcp2 fragment from HFSE1850 and the 3' NdeI-NotI dcp2 fragment from HFSE1877 to HFSE1645 digested by NheI-NotI
HFSE1912	Bs-ks-HA-dcp2-LD1-8(S-N)	SalI	BglII-NotI	constructed by ligating the 5' NheI-NdeI dcp2 fragment from HFSE1850 and the 3' NdeI-NotI dcp2 fragment from HFSE1909 to HFSE1645 digested by NheI-NotI
HFSE1914	Bs-ks-HA-dcp2-LD1-9(S-N)	SalI	BglII-NotI	constructed by ligating the 5' NheI-NdeI dcp2 fragment from HFSE1850 and the 3' NdeI-NotI dcp2 fragment from HFSE11910 to HFSE1645 digested by NheI-NotI
HFSE1976	Bs-ks-HA-dcp2-LD9(S-N)	SalI	BglII-NotI	constructed by site-directed mutagesis using the plasmid HFSE1645 as template and the oligonucleotides DCP2-LD9-F/DCP2-LD9-R as PCR primers
HFSE1978	Bs-ks-HA-dcp2-LD9-8(S-N)	SalI	BglII-NotI	constructed by site-directed mutagesis using the plasmid HFSE1976 as template and the oligonucleotides DCP2-LD8-F3/DCP2-LD8-R3 as PCR primers
HFSE1980	Bs-ks-HA-dcp2-LD9-7(S-N)	SalI	BglII-NotI	constructed by site-directed mutagesis using the plasmid HFSE1978 as template and the oligonucleotides DCP2-LD7-F/DCP2-LD7-R as PCR primers
HFSE1982	Bs-ks-HA-dcp2-LD9-6(S-N)	SalI	BglII-NotI	constructed by site-directed mutagesis using the plasmid HFSE1980 as template and the oligonucleotides DCP2-LD6-F/DCP2-LD6-R as PCR primers
HFSE1984	Bs-ks-HA-dcp2-LD9-5(S-N)	SalI	BglII-NotI	constructed by site-directed mutagesis using the plasmid HFSE1982 as template and the oligonucleotides DCP2-LD5-F/DCP2-LD5-R as PCR primers
HFSE1986	Bs-ks-HA-dcp2-LD9-4(S-N)	SalI	BglII-NotI	constructed by site-directed mutagesis using the plasmid HFSE1984 as template and the oligonucleotides DCP2-LD4-F/DCP2-LD4-R as PCR primers
HFSE1989	Bs-ks-HA-dcp2-LD9-3(S-N)	SalI	BglII-NotI	constructed by site-directed mutagesis using the plasmid HFSE1986 as template and the oligonucleotides DCP2-LD3-F/DCP2-LD3-R as PCR primers
HFSE1990	Bs-ks-HA-dcp2-LD9-2(S-N)	SalI	BglII-NotI	constructed by site-directed mutagesis using the plasmid HFSE1989 as template and the oligonucleotides DCP2-LD2-F/DCP2-LD2-R as PCR primers
HFSE2077	Bs-ks-HA-dcp2-E3D-LD1-8(S-N)	SalI	BglII-NotI	constructed by ligating the 5' NheI-XhoI dcp2 fragment from HFSE1647 and the 3' XhoI-NotI dcp2 fragment from HFSE1912 to HFSE1645 digested by NheI-NotI
HFSE2078	Bs-ks-HA-dcp2-E3D-LD1-9(S-N)	SalI	BglII-NotI	constructed by ligating the 5' NheI-XhoI dcp2 fragment from HFSE1647 and the 3' XhoI-NotI dcp2 fragment from HFSE1914 to HFSE1645 digested by NheI-NotI
HFSE2081	Bs-ks-HA-dcp2-E3D-LD9-3(S-N)	SalI	BglII-NotI	constructed by ligating the 5' NheI-XhoI dcp2 fragment from HFSE1647 and the 3' XhoI-NotI dcp2 fragment from HFSE1989 to HFSE1645 digested by NheI-NotI
HFSE2083	Bs-ks-HA-dcp2-E3D-LD9-2(S-N)	SalI	BglII-NotI	constructed by ligating the 5' NheI-XhoI dcp2 fragment from HFSE1647 and the 3' XhoI-NotI dcp2 fragment from HFSE1990 to HFSE1645 digested by NheI-NotI
HFSE2084	Bs-ks-HA-dcp2-E3D1-LD1-8(S-N)	SalI	BglII-NotI	constructed by ligating the 5' NheI-XhoI dcp2 fragment from HFSE1842 and the 3' XhoI-NotI dcp2 fragment from HFSE1912 to HFSE1645 digested by NheI-NotI
HFSE2086	Bs-ks-HA-dcp2-E3D1-LD1-9(S-N)	SalI	BglII-NotI	constructed by ligating the 5' NheI-XhoI dcp2 fragment from HFSE1842 and the 3' XhoI-NotI dcp2 fragment from HFSE1914 to HFSE1645 digested by NheI-NotI
HFSE2089	Bs-ks-HA-dcp2-E3D1-LD9-3(S-N)	SalI	BglII-NotI	constructed by ligating the 5' NheI-XhoI dcp2 fragment from HFSE1842 and the 3' XhoI-NotI dcp2 fragment from HFSE1989 to HFSE1645 digested by NheI-NotI
HFSE2091	Bs-ks-HA-dcp2-E3D1-LD9-2(S-N)	SalI	BglII-NotI	constructed by ligating the 5' NheI-XhoI dcp2 fragment from HFSE1842 and the 3' XhoI-NotI dcp2 fragment from HFSE1990 to HFSE1645 digested by NheI-NotI
HFSE2157	Bs-ks-HA-dcp2-U1D1-LD1-9(S-N)	SalI	BglII-NotI	constructed by site-directed mutagesis using the plasmid HFSE1914 as template and the oligonucleotides DCP2-U1D-F1/DCP2-U1D-R1 as PCR primers
HFSE2158	Bs-ks-HA-dcp2-U1D2-LD1-9(S-N)	SalI	BglII-NotI	constructed by site-directed mutagesis using the plasmid HFSE1914 as template and the oligonucleotides DCP2-U1D-F2/DCP2-U1D-R2 as PCR primers
HFSE2161	Bs-ks-HA-dcp2-U1D1-U1D2-LD1-9(S-N)	SalI	BglII-NotI	constructed by site-directed mutagesis using the plasmid HFSE2158 as template and the oligonucleotides DCP2-U1D-F1/DCP2-U1D-R1 as PCR primers
HFSE2162	Bs-ks-HA-dcp2-E3D-U1D1-LD1-9(S-N)	SalI	BglII-NotI	constructed by ligating the 5' NheI-XhoI dcp2 fragment from HFSE1647 and the 3' XhoI-NotI dcp2 fragment from HFSE2157 to HFSE1645 digested by NheI-NotI
HFSE2164	Bs-ks-HA-dcp2-E3D-U1D2-LD1-9(S-N)	SalI	BglII-NotI	constructed by ligating the 5' NheI-XhoI dcp2 fragment from HFSE1647 and the 3' XhoI-NotI dcp2 fragment from HFSE2158 to HFSE1645 digested by NheI-NotI
HFSE2166	Bs-ks-HA-dcp2-E3D-U1D1-U1D2-LD1-9(S-N)	SalI	BglII-NotI	constructed by ligating the 5' NheI-XhoI dcp2 fragment from HFSE1647 and the 3' XhoI-NotI dcp2 fragment from HFSE2161 to HFSE1645 digested by NheI-NotI
HFSE2168	Bs-ks-HA-dcp2-E3D1-U1D1-LD1-9(S-N)	SalI	BglII-NotI	constructed by ligating the 5' NheI-XhoI dcp2 fragment from HFSE1842 and the 3' XhoI-NotI dcp2 fragment from HFSE2157 to HFSE1645 digested by NheI-NotI
HFSE2170	Bs-ks-HA-dcp2-E3D1-U1D2-LD1-9(S-N)	SalI	BglII-NotI	constructed by ligating the 5' NheI-XhoI dcp2 fragment from HFSE1842 and the 3' XhoI-NotI dcp2 fragment from HFSE2158 to HFSE1645 digested by NheI-NotI
HFSE2172	Bs-ks-HA-dcp2-E3D1-U1D1-U1D2-LD1-9(S-N)	SalI	BglII-NotI	constructed by ligating the 5' NheI-XhoI dcp2 fragment from HFSE1842 and the 3' XhoI-NotI dcp2 fragment from HFSE2161 to HFSE1645 digested by NheI-NotI
HFSE1718	Bs-ks-XhoI-DCP2-TH-FL	BamHI	NcoI-SalI	contains the enire DCP2 coding sequences and the 3' UTR as a BamH-SalI fragment
HFSE1720	Bs-ks-XhoI-dcp2-E3D-TH-FL	BamHI	NcoI-SalI	same as HFSE1718 but contains the E3D deletion, constructed by replacing the 5' BamHI-XhoI fragment of HFSE1718 with the corresponding PCR-amplified fragment from HFSE1647
HFSE1721	Bs-ks-XhoI-dcp2-ID-TH-FL	BamHI	NcoI-SalI	same as HFSE1718 but contains the ID deletion, constructed by replacing the 3' XhoI-NcoI fragment of HFSE1718 with the corresponding fragment from HFSE1668
HFSE1724	Bs-ks-XhoI-dcp2-U1D1-TH-FL	BamHI	NcoI-SalI	same as HFSE1718 but contains the U1D1 deletion, constructed by replacing the 3' XhoI-NcoI fragment of HFSE1718 with the corresponding fragment from HFSE1648
HFSE1725	Bs-ks-XhoI-dcp2-U1D2-TH-FL	BamHI	NcoI-SalI	same as HFSE1718 but contains the U1D2D deletion, constructed by replacing the 3' XhoI-NcoI fragment of HFSE1718 with the corresponding fragment from HFSE1651
HFSE1728	Bs-ks-XhoI-dcp2-ID-U1D1-TH-FL	BamHI	NcoI-SalI	same as HFSE1718 but contains the ID-U1D1 deletions, constructed by replacing the 3' XhoI-NcoI fragment of HFSE1718 with the corresponding fragment from HFSE1671
HFSE1729	Bs-ks-XhoI-dcp2-ID-U1D2-TH-FL	BamHI	NcoI-SalI	same as HFSE1718 but contains the ID-U1D2 deletions, constructed by replacing the 3' XhoI-NcoI fragment of HFSE1718 with the corresponding fragment from HFSE1674
HFSE1732	Bs-ks-XhoI-dcp2-U1D1-U1D2-TH-FL	BamHI	NcoI-SalI	same as HFSE1718 but contains the U1D1-U1D2 deletions, constructed by replacing the 3' XhoI-NcoI fragment of HFSE1718 with the corresponding fragment from HFSE1677
HFSE1733	Bs-ks-XhoI-dcp2-ID-U1D1-U1D2-TH-FL	BamHI	NcoI-SalI	same as HFSE1718 but contains the ID-U1D1-U1D2 deletions, constructed by replacing the 3' XhoI-NcoI fragment of HFSE1718 with the corresponding fragment from HFSE1700
HFSE1735	Bs-ks-XhoI-dcp2-E3D-ID-TH-FL	BamHI	NcoI-SalI	same as HFSE1718 but contains the E3D-ID deletions, constructed by replacing the 3' XhoI-NcoI fragment of HFSE1720 with the corresponding fragment from HFSE1668
HFSE1737	Bs-ks-XhoI-dcp2-E3D-U1D1-TH-FL	BamHI	NcoI-SalI	same as HFSE1718 but contains the E3D-U1D1 deletions, constructed by replacing the 3' XhoI-NcoI fragment of HFSE1720 with the corresponding fragment from HFSE1648
HFSE1739	Bs-ks-XhoI-dcp2-E3D-U1D2-TH-FL	BamHI	NcoI-SalI	same as HFSE1718 but contains the E3D-U1D2D deletions, constructed by replacing the 3' XhoI-NcoI fragment of HFSE1720 with the corresponding fragment from HFSE1651
HFSE1741	Bs-ks-XhoI-dcp2-E3D-ID-U1D1-TH-FL	BamHI	NcoI-SalI	same as HFSE1718 but contains the E3D-ID-U1D1 deletions, constructed by replacing the 3' XhoI-NcoI fragment of HFSE1720 with the corresponding fragment from HFSE1671
HFSE1743	Bs-ks-XhoI-dcp2-E3D-ID-U1D2-TH-FL	BamHI	NcoI-SalI	same as HFSE1718 but contains the E3D-ID-U1D2 deletions, constructed by replacing the 3' XhoI-NcoI fragment of HFSE1720 with the corresponding fragment from HFSE1674
HFSE1745	Bs-ks-XhoI-dcp2-E3D-U1D1-U1D2-TH-FL	BamHI	NcoI-SalI	same as HFSE1718 but contains the E3D-U1D1-U1D2 deletions, constructed by replacing the 3' XhoI-NcoI fragment of HFSE1720 with the corresponding fragment from HFSE1677
HFSE1747	Bs-ks-XhoI-dcp2-E3D-ID-U1D1-U1D2-TH-FL	BamHI	NcoI-SalI	same as HFSE1718 but contains the E3D-ID-U1D1-U1D2 deletions, constructed by replacing the 3' XhoI-NcoI fragment of HFSE1720 with the corresponding fragment from HFSE1700
HFSE1904	Bs-ks-XhoI-dcp2-E3D1-TH-FL	BamHI	NcoI-SalI	same as HFSE1718 but contains the ED1 deletion, constructed by replacing the 5' BamHI-XhoI fragment of HFSE1718 with the corresponding PCR-amplified fragment from HFSE1842
HFSE1906	Bs-ks-XhoI-dcp2-E3D2-TH-FL	BamHI	NcoI-SalI	same as HFSE1718 but contains the ED2 deletion, constructed by replacing the 5' BamHI-XhoI fragment of HFSE1718 with the corresponding PCR-amplified fragment from HFSE1843
HFSE1890	Bs-ks-XhoI-dcp2-LD1-TH-FL	BamHI	NcoI-SalI	same as HFSE1718 but contains LD1 deletion, constructed by replacing the 3' XhoI-NcoI fragment of HFSE1718 with the corresponding fragment from HFSE1844
HFSE1892	Bs-ks-XhoI-dcp2-LD1-2-TH-FL	BamHI	NcoI-SalI	same as HFSE1718 but contains LD1-2 deletions, constructed by replacing the 3' XhoI-NcoI fragment of HFSE1718 with the corresponding fragment from HFSE1850
HFSE1894	Bs-ks-XhoI-dcp2-LD1-3-TH-FL	BamHI	NcoI-SalI	same as HFSE1718 but contains LD1-3 deletions, constructed by replacing the 3' XhoI-NcoI fragment of HFSE1718 with thecorresponding fragment from HFSE1856
HFSE1896	Bs-ks-XhoI-dcp2-LD1-4-TH-FL	BamHI	NcoI-SalI	same as HFSE1718 but contains LD1-4 deletions, constructed by replacing the 3' XhoI-NcoI fragment of HFSE1718 with the corresponding fragment from HFSE1858
HFSE1898	Bs-ks-XhoI-dcp2-LD1-5-TH-FL	BamHI	NcoI-SalI	same as HFSE1718 but contains LD1-5 deletions, constructed by replacing the 3' XhoI-NcoI fragment of HFSE1718 with the corresponding fragment from HFSE1860
HFSE1900	Bs-ks-XhoI-dcp2-LD1-6-TH-FL	BamHI	NcoI-SalI	same as HFSE1718 but contains LD1-6 deletions, constructed by replacing the 3' XhoI-NcoI fragment of HFSE1718 with the corresponding fragment from HFSE1878
HFSE1902	Bs-ks-XhoI-dcp2-LD1-7-TH-FL	BamHI	NcoI-SalI	same as HFSE1718 but contains LD1-7 deletions, constructed by replacing the 3' XhoI-NcoI fragment of HFSE1718 with the corresponding fragment from HFSE1880
HFSE1916	Bs-ks-XhoI-dcp2-LD1-8-TH-FL	BamHI	NcoI-SalI	same as HFSE1718 but contains LD1-8 deletions, constructed by replacing the 3' XhoI-NcoI fragment of HFSE1718 with the corresponding fragment from HFSE1912
HFSE1919	Bs-ks-XhoI-dcp2-LD1-9-TH-FL	BamHI	NcoI-SalI	same as HFSE1718 but contains LD1-9 deletions, constructed by replacing the 3' XhoI-NcoI fragment of HFSE1718 with the corresponding fragment from HFSE1914
HFSE1920	Bs-ks-XhoI-dcp2-LD3-9-TH-FL	BamHI	NcoI-SalI	same as HFSE1718 but contains LD3-9 deletions, constructed by replacing the 3' XhoI-NcoI fragment of HFSE1718 with the corresponding fragment from HFSE1910
HFSE1992	Bs-ks-XhoI-dcp2-LD9-TH-FL	BamHI	NcoI-SalI	same as HFSE1718 but contains LD9 deletion, constructed by replacing the 3' XhoI-NcoI fragment of HFSE1718 with the corresponding fragment from HFSE1976
HFSE1994	Bs-ks-XhoI-dcp2-LD9-8-TH-FL	BamHI	NcoI-SalI	same as HFSE1718 but contains LD9-8 deletions, constructed by replacing the 3' XhoI-NcoI fragment of HFSE1718 with the corresponding fragment from HFSE1978
HFSE1996	Bs-ks-XhoI-dcp2-LD9-7-TH-FL	BamHI	NcoI-SalI	same as HFSE1718 but contains LD9-7 deletions, constructed by replacing the 3' XhoI-NcoI fragment of HFSE1718 with the corresponding fragment from HFSE1980
HFSE1998	Bs-ks-XhoI-dcp2-LD9-6-TH-FL	BamHI	NcoI-SalI	same as HFSE1718 but contains LD9-6 deletions, constructed by replacing the 3' XhoI-NcoI fragment of HFSE1718 with the corresponding fragment from HFSE1982
HFSE2000	Bs-ks-XhoI-dcp2-LD9-5-TH-FL	BamHI	NcoI-SalI	same as HFSE1718 but contains LD9-5 deletions, constructed by replacing the 3' XhoI-NcoI fragment of HFSE1718 with the corresponding fragment from HFSE1984
HFSE2002	Bs-ks-XhoI-dcp2-LD9-4-TH-FL	BamHI	NcoI-SalI	same as HFSE1718 but contains LD9-4 deletions, constructed by replacing the 3' XhoI-NcoI fragment of HFSE1718 with the corresponding fragment from HFSE1986
HFSE2004	Bs-ks-XhoI-dcp2-LD9-3-TH-FL	BamHI	NcoI-SalI	same as HFSE1718 but contains LD9-3 deletions, constructed by replacing the 3' XhoI-NcoI fragment of HFSE1718 with the corresponding fragment from HFSE1989
HFSE2006	Bs-ks-XhoI-dcp2-LD9-2-TH-FL	BamHI	NcoI-SalI	same as HFSE1718 but contains LD9-2 deletions, constructed by replacing the 3' XhoI-NcoI fragment of HFSE1718 with the corresponding fragment from HFSE1990
HFSE2108	Bs-ks-XhoI-dcp2-E3D-LD1-8-TH-FL	BamHI	NcoI-SalI	same as HFSE1718 but contains E3D-LD1-8 deletions, constructed by replacing the 3' XhoI-NcoI fragment of HFSE1720 with the corresponding fragment from HFSE1912
HFSE2110	Bs-ks-XhoI-dcp2-E3D-LD1-9-TH-FL	BamHI	NcoI-SalI	same as HFSE1718 but contains E3D-LD1-9 deletions, constructed by replacing the 3' XhoI-NcoI fragment of HFSE1720 with the corresponding fragment from HFSE1914
HFSE2112	Bs-ks-XhoI-dcp2-E3D-LD9-3-TH-FL	BamHI	NcoI-SalI	same as HFSE1718 but contains E3D-LD9-3 deletions, constructed by replacing the 3' XhoI-NcoI fragment of HFSE1720 with the corresponding fragment from HFSE1989
HFSE2114	Bs-ks-XhoI-dcp2-E3D-LD9-2-TH-FL	BamHI	NcoI-SalI	same as HFSE1718 but contains E3D-LD9-2 deletions, constructed by replacing the 3' XhoI-NcoI fragment of HFSE1720 with the corresponding fragment from HFSE1990
HFSE2116	Bs-ks-XhoI-dcp2-E3D1-LD1-8-TH-FL	BamHI	NcoI-SalI	same as HFSE1718 but contains ED1-LD1-8 deletions, constructed by replacing the 3' XhoI-NcoI fragment of HFSE1904 with the corresponding fragment from HFSE1912
HFSE2118	Bs-ks-XhoI-dcp2-E3D1-LD1-9-TH-FL	BamHI	NcoI-SalI	same as HFSE1718 but contains ED1-LD1-9 deletions, constructed by replacing the 3' XhoI-NcoI fragment of HFSE1904 with the corresponding fragment from HFSE1914
HFSE2120	Bs-ks-XhoI-dcp2-E3D1-LD9-3-TH-FL	BamHI	NcoI-SalI	same as HFSE1718 but contains ED1-LD9-3 deletions, constructed by replacing the 3' XhoI-NcoI fragment of HFSE1904 with the corresponding fragment from HFSE1989
HFSE2122	Bs-ks-XhoI-dcp2-E3D1-LD9-2-TH-FL	BamHI	NcoI-SalI	same as HFSE1718 but contains ED1-LD9-2 deletions, constructed by replacing the 3' XhoI-NcoI fragment of HFSE1904 with the correspondingfragment from HFSE1990
HFSE2188	Bs-ks-XhoI-dcp2-U1D1-LD1-9-TH-FL	BamHI	NcoI-SalI	same as HFSE1718 but contains U1D1-LD1-9 deletions, constructed by replacing the 3' XhoI-NcoI fragment of HFSE1718 with the corresponding fragment from HFSE2157
HFSE2190	Bs-ks-XhoI-dcp2-U1D2-LD1-9-TH-FL	BamHI	NcoI-SalI	same as HFSE1718 but contains U1D2-LD1-9 deletions, constructed by replacing the 3' XhoI-NcoI fragment of HFSE11718 with the corresponding fragment from HFSE2158
HFSE2192	Bs-ks-XhoI-dcp2-U1D1-U1D2-LD1-9-TH-FL	BamHI	NcoI-SalI	same as HFSE1718 but contains U1D1-U1D2-LD1-9 deletions,constructed by replacing the 3' XhoI-NcoI fragment of HFSE1718 with the corresponding fragment from HFSE2161
HFSE2194	Bs-ks-XhoI-dcp2-E3D-U1D1-LD1-9-TH-FL	BamHI	NcoI-SalI	same as HFSE1718 but contains E3D-U1D1-LD1-9 deletions, constructed by replacing the 3' XhoI-NcoI fragment of HFSE1720 with the corresponding fragment from HFSE2157
HFSE2196	Bs-ks-XhoI-dcp2-E3D-U1D2-LD1-9-TH-FL	BamHI	NcoI-SalI	same as HFSE1718 but contains E3D-U1D2-LD1-9 deletions, constructed by replacing the 3' XhoI-NcoI fragment of HFSE1720 with the corresponding fragment from HFSE2158
HFSE2198	Bs-ks-XhoI-dcp2-E3D-U1D1-U1D2-LD1-9-TH-FL	BamHI	NcoI-SalI	same as HFSE1718 but contains E3D-U1D1-U1D2-LD1-9 deletions, constructed by replacing the 3' XhoI-NcoI fragment of HFSE1720 with the corresponding fragment from HFSE2161
HFSE2200	Bs-ks-XhoI-dcp2-E3D1-U1D1-LD1-9-TH-FL	BamHI	NcoI-SalI	same as HFSE1718 but contains ED1-U1D1-LD1-9 deletions, constructed by replacing the 3' XhoI-NcoI fragment of HFSE1904 with thecorresponding fragment from HFSE2157
HFSE2202	Bs-ks-XhoI-dcp2-E3D1-U1D2-LD1-9-TH-FL	BamHI	NcoI-SalI	same as HFSE1718 but contains ED1-U1D2-LD1-9 deletions, constructed by replacing the 3' XhoI-NcoI fragment of HFSE1904 with thecorresponding fragment from HFSE2158
HFSE2205	Bs-ks-XhoI-dcp2-E3D1-U1D1-U1D2-LD1-9-TH-FL	BamHI	NcoI-SalI	same as HFSE1718 but contains ED1-U1D1-U1D2-LD1-9 deletions, constructed by replacing the 3' XhoI-NcoI fragment of HFSE1904 with the corresponding fragment from HFSE2161
HFSE1798	pMA424-DCP2	BamHI	SalI	constructed by ligating the BamI-SalI DCP2 fragment from HFSE1718 to pMA424 digested by BamHI-SalI
HFSE1749	pMA424-dcp2-E3D	BamHI	SalI	constructed by ligating the BamI-SalI dcp2 fragment from HFSE1720 to pMA424 digested by BamHI-SalI
HFSE1799	pMA424-dcp2-ID	BamHI	SalI	constructed by ligating the BamI-SalI dcp2 fragment from HFSE1721 to pMA424 digested by BamHI-SalI
HFSE1801	pMA424-dcp2-U1D1	BamHI	SalI	constructed by ligating the BamI-SalI dcp2 fragment from HFSE1724 to pMA424 digested by BamHI-SalI
HFSE1803	pMA424-dcp2-U1D2	BamHI	SalI	constructed by ligating the BamI-SalI dcp2 fragment from HFSE1725 to pMA424 digested by BamHI-SalI
HFSE1805	pMA424-dcp2-ID-U1D1	BamHI	SalI	constructed by ligating the BamI-SalI dcp2 fragment from HFSE1728 to pMA424 digested by BamHI-SalI
HFSE1807	pMA424-dcp2-ID-U1D2	BamHI	SalI	constructed by ligating the BamI-SalI dcp2 fragment from HFSE1729 to pMA424 digested by BamHI-SalI
HFSE1809	pMA424-dcp2-U1D1-U1D2	BamHI	SalI	constructed by ligating the BamI-SalI dcp2 fragment from HFSE1732 to pMA424 digested by BamHI-SalI
HFSE1811	pMA424-dcp2-ID-U1D1-U1D2	BamHI	SalI	constructed by ligating the BamI-SalI dcp2 fragment from HFSE1733 to pMA424 digested by BamHI-SalI
HFSE1751	pMA424-dcp2-E3D-ID	BamHI	SalI	constructed by ligating the BamI-SalI dcp2 fragment from HFSE1735 to pMA424 digested by BamHI-SalI
HFSE1753	pMA424-dcp2-E3D-U1D1	BamHI	SalI	constructed by ligating the BamI-SalI dcp2 fragment from HFSE1737 to pMA424 digested by BamHI-SalI
HFSE1755	pMA424-dcp2-E3D-U1D2	BamHI	SalI	constructed by ligating the BamI-SalI dcp2 fragment from HFSE1739 to pMA424 digested by BamHI-SalI
HFSE1757	pMA424-dcp2-E3D-ID-U1D1	BamHI	SalI	constructed by ligating the BamI-SalI dcp2 fragment from HFSE1741 to pMA424 digested by BamHI-SalI
HFSE1759	pMA424-dcp2-E3D-ID-U1D2	BamHI	SalI	constructed by ligating the BamI-SalI dcp2 fragment from HFSE1743 to pMA424 digested by BamHI-SalI
HFSE1761	pMA424-dcp2-E3D-U1D1-U1D2	BamHI	SalI	constructed by ligating the BamI-SalI dcp2 fragment from HFSE1745 to pMA424 digested by BamHI-SalI
HFSE1763	pMA424-dcp2-E3D-ID-U1D1-U1D2	BamHI	SalI	constructed by ligating the BamI-SalI dcp2 fragment from HFSE1747 to pMA424 digested by BamHI-SalI
HFSE1966	pMA424-dcp2-E3D1	BamHI	SalI	constructed by ligating the BamI-SalI dcp2 fragment from HFSE1904 to pMA424 digested by BamHI-SalI
HFSE1974	pMA424-dcp2-E3D2	BamHI	SalI	constructed by ligating the BamI-SalI dcp2 fragment from HFSE1906 to pMA424 digested by BamHI-SalI
HFSE1953	pMA424-dcp2-LD1	BamHI	SalI	constructed by ligating the BamI-SalI dcp2 fragment from HFSE1890 to pMA424 digested by BamHI-SalI
HFSE1955	pMA424-dcp2-LD1-2	BamHI	SalI	constructed by ligating the BamI-SalI dcp2 fragment from HFSE1892 to pMA424 digested by BamHI-SalI
HFSE1957	pMA424-dcp2-LD1-3	BamHI	SalI	constructed by ligating the BamI-SalI dcp2 fragment from HFSE1894 to pMA424 digested by BamHI-SalI
HFSE1959	pMA424-dcp2-LD1-4	BamHI	SalI	constructed by ligating the BamI-SalI dcp2 fragment from HFSE1896 to pMA424 digested by BamHI-SalI
HFSE1961	pMA424-dcp2-LD1-5	BamHI	SalI	constructed by ligating the BamI-SalI dcp2 fragment from HFSE1898 to pMA424 digested by BamHI-SalI
HFSE1963	pMA424-dcp2-LD1-6	BamHI	SalI	constructed by ligating the BamI-SalI dcp2 fragment from HFSE1900 to pMA424 digested by BamHI-SalI
HFSE1965	pMA424-dcp2-LD1-7	BamHI	SalI	constructed by ligating the BamI-SalI dcp2 fragment from HFSE1902 to pMA424 digested by BamHI-SalI
HFSE1968	pMA424-dcp2-LD1-8	BamHI	SalI	constructed by ligating the BamI-SalI dcp2 fragment from HFSE1916 to pMA424 digested by BamHI-SalI
HFSE1970	pMA424-dcp2-LD1-9	BamHI	SalI	constructed by ligating the BamI-SalI dcp2 fragment from HFSE1919 to pMA424 digested by BamHI-SalI
HFSE1972	pMA424-dcp2-LD3-9	BamHI	SalI	constructed by ligating the BamI-SalI dcp2 fragment from HFSE1920 to pMA424 digested by BamHI-SalI
HFSE2008	pMA424-dcp2-LD9	BamHI	SalI	constructed by ligating the BamI-SalI dcp2 fragment from HFSE1992 to pMA424 digested by BamHI-SalI
HFSE2010	pMA424-dcp2-LD9-8	BamHI	SalI	constructed by ligating the BamI-SalI dcp2 fragment from HFSE1994 to pMA424 digested by BamHI-SalI
HFSE2012	pMA424-dcp2-LD9-7	BamHI	SalI	constructed by ligating the BamI-SalI dcp2 fragment from HFSE1996 to pMA424 digested by BamHI-SalI
HFSE2014	pMA424-dcp2-LD9-6	BamHI	SalI	constructed by ligating the BamI-SalI dcp2 fragment from HFSE1998 to pMA424 digested by BamHI-SalI
HFSE2016	pMA424-dcp2-LD9-5	BamHI	SalI	constructed by ligating the BamI-SalI dcp2 fragment from HFSE2000 to pMA424 digested by BamHI-SalI
HFSE2018	pMA424-dcp2-LD9-4	BamHI	SalI	constructed by ligating the BamI-SalI dcp2 fragment from HFSE2002 to pMA424 digested by BamHI-SalI
HFSE2020	pMA424-dcp2-LD9-3	BamHI	SalI	constructed by ligating the BamI-SalI dcp2 fragment from HFSE2004 to pMA424 digested by BamHI-SalI
HFSE2022	pMA424-dcp2-LD9-2	BamHI	SalI	constructed by ligating the BamI-SalI dcp2 fragment from HFSE2006 to pMA424 digested by BamHI-SalI
HFSE2124	pMA424-dcp2-E3D-LD1-8	BamHI	SalI	constructed by ligating the BamI-SalI dcp2 fragment from HFSE2108 to pMA424 digested by BamHI-SalI
HFSE2150	pMA424-dcp2-E3D-LD1-9	BamHI	SalI	constructed by ligating the BamI-SalI dcp2 fragment from HFSE2110 to pMA424 digested by BamHI-SalI
HFSE2152	pMA424-dcp2-E3D-LD9-3	BamHI	SalI	constructed by ligating the BamI-SalI dcp2 fragment from HFSE2112 to pMA424 digested by BamHI-SalI
HFSE2154	pMA424-dcp2-E3D-LD9-2	BamHI	SalI	constructed by ligating the BamI-SalI dcp2 fragment from HFSE2114 to pMA424 digested by BamHI-SalI
HFSE2126	pMA424-dcp2-E3D1-LD1-8	BamHI	SalI	constructed by ligating the BamI-SalI dcp2 fragment from HFSE2116 to pMA424 digested by BamHI-SalI
HFSE2130	pMA424-dcp2-E3D1-LD1-9	BamHI	SalI	constructed by ligating the BamI-SalI dcp2 fragment from HFSE2118 to pMA424 digested by BamHI-SalI
HFSE2148	pMA424-dcp2-E3D1-LD9-3	BamHI	SalI	constructed by ligating the BamI-SalI dcp2 fragment from HFSE2120 to pMA424 digested by BamHI-SalI
HFSE2128	pMA424-dcp2-E3D1-LD9-2	BamHI	SalI	constructed by ligating the BamI-SalI dcp2 fragment from HFSE2122 to pMA424 digested by BamHI-SalI
HFSE2239	pMA424-dcp2-U1D1-LD1-9	BamHI	SalI	constructed by ligating the BamI-SalI dcp2 fragment from HFSE2188 to pMA424 digested by BamHI-SalI
HFSE2225	pMA424-dcp2-U1D2-LD1-9	BamHI	SalI	constructed by ligating the BamI-SalI dcp2 fragment from HFSE2190 to pMA424 digested by BamHI-SalI
HFSE2211	pMA424I-dcp2-U1D1-U1D2-LD1-9	BamHI	SalI	constructed by ligating the BamI-SalI dcp2 fragment from HFSE2192 to pMA424 digested by BamHI-SalI
HFSE2213	pMA424I-dcp2-E3D-U1D1-LD1-9	BamHI	SalI	constructed by ligating the BamI-SalI dcp2 fragment from HFSE2194 to pMA424 digested by BamHI-SalI
HFSE2215	pMA424-dcp2-E3D-U1D2-LD1-9	BamHI	SalI	constructed by ligating the BamI-SalI dcp2 fragment from HFSE2196 to pMA424 digested by BamHI-SalI
HFSE2217	pMA424-dcp2-E3D-U1D1-U1D2-LD1-9	BamHI	SalI	constructed by ligating the BamI-SalI dcp2 fragment from HFSE2198 to pMA424 digested by BamHI-SalI
HFSE2219	pMA424-dcp2-E3D1-U1D1-LD1-9	BamHI	SalI	constructed by ligating the BamI-SalI dcp2 fragment from HFSE2200 to pMA424 digested by BamHI-SalI
HFSE2221	pMA424-dcp2-E3D1-U1D2-LD1-9	BamHI	SalI	constructed by ligating the BamI-SalI dcp2 fragment from HFSE2202 to pMA424 digested by BamHI-SalI
HFSE2223	pMA424-dcp2-E3D1-U1D1-U1D2-LD1-9	BamHI	SalI	constructed by ligating the BamI-SalI dcp2 fragment from HFSE2205 to pMA424 digested by BamHI-SalI
HFSE1596	pMA424-SCD6	EcoRI	SalI	Entire XRN1 conding region is fused to GAL4(DB) as a EcoRI-SalI fragment
HFSE1602	pGAD-C2-SCD6	EcoRI	SalI	Entire XRN1 conding region is fused to GAL4(AD) as a EcoRI-SalI fragment
HFSE1541	pMA424-XRN1	BamHI	SalI	Entire XRN1 conding region is fused to GAL4(DB ) as a BamHI-SalI fragment
HFSE1537	pGAD-C2-XRN1	BamHI	SalI	Entire XRN1 conding region is fused to GAL4(AD) as a BamHI-SalI fragment
HFSE210	pMA424-DCP1	BamHI	SalI	Entire DCP1 conding region is fused to GAL4(DB ) as a BamHI-SalI fragment, described previously in He and Jacobson (2015)
HFSE218	pGAD-C2-DCP1	BamHI	SalI	Entire DCP1 coding region is fused to GAL4(AD) as a BamHI-SalI fragment, described previously in He and Jacobson (2015)
HFSE224	pMA424-EDC3	EcoRI	SalI	Entire EDC3 coding region is fused to GAL4(DB) as an EcoRI-SalI fragment, described previously in He and Jacobson (2015)
HFSE228	pGAD-C2-EDC3	EcoRI	SalI	Entire EDC3 coding region is fused to GAL4(AD) as an EcoRI-SalI fragment, described previously in He and Jacobson (2015)
HFE5	pMA424-UPF1	EcoRI	SalI	Entire UPF1 coding region is fused to GAL4(DB) as an EcoRI-SalI fragment, described previously in He and Jacobson (2015)
HFE1668	pGAD-C1-UPF1	EcoRI	SalI	Entire UPF1 coding region is fused to GAL4(AD) as an EcoRI-SalI fragment, described previously in He and Jacobson (2015)
HFE618	pACTII-UPF2	BamHI	SalI	Entire UPF2 coding region is fused to GAL4(AD) as a BamHI-SalI fragment, described previously in He and Jacobson (2015)
HFE1414	pGAD-C2-UPF3	BamHI	SalI	Entire UPF3 coding region is fused to GAL4(AD) as a BamHI-SalI fragment, described previously in He and Jacobson (2015)
HFCE136	pMA424-DHH1	BamHI	SalI	Entire DHH1 coding region is fused to GAL4(DB) as a BamHI-SalI fragment, described previously in He and Jacobson (2015)
HFCE142	pGAD-C2-DHH1	BamHI	SalI	Entire DHH1 coding region is fused to GAL4(AD) as a BamHI-SalI fragment, described previously in He and Jacobson (2015)
HFCE130	pGAD-C2-PAT1	EcoRI	SalI	Entire PAT1 coding region is fused to GAL4(AD) as an EcoRI-SalI fragment, described previously in He and Jacobson (2015)
HFCE126	pGAD-C2-LSM1	EcoRI	SalI	Entire LSM1 coding region is fused to GAL4(AD) as an EcoRI-SalI fragment, described previously in He and Jacobson (2015)
HFSE1532	pRS315-3'-XRN1	SacI	XbaI/SalI	Contains the XRN1 3' coding region from nt 298 to 4584 followed by added sequences XbaI-Stop-SalI as a SacI-SalI fragment
