# Supplementary material for: Dcp2 C-terminal cis-binding elements control selective targeting of the decapping enzyme by forming distinct decapping complexes
Source: eLife. 2022 May 23;11:e74410. doi: 10.7554/eLife.74410 (PMC9170289; doi:10.7554/eLife.74410)
Supplement: Supplementary file 3. [file elife-74410-supp3.xlsx]

## Sheet: Sheet1
Supplementary file 3. Oligonucleotides used in this study
Name	Sequence
DCP2-NcoI-F(4032)	ATATCCATGGTATCGACTTTTGGCCAAACC
DCP2-DS4(B-N-S)	GATCGTCGACGCGGCCGCAGATCTGCAAGATTCAAAATTAGGGCAATCTCACACA
DCP2-DS4(BH-N-S)	GATCGTCGACGCGGCCGCGGATCCGCAAGATTCAAAATTAGGGCAATCTCACACA
DCP2-E3D-F	CAGAGGCAAATAAAAAATGAAGATGCTAACAGTAATAATAATGCGGTC
DCP2-E3D-R	GACCGCATTATTATTACTGTTAGCATCTTCATTTTTTATTTGCCTCTG
DCP2-U1D-F1	AATTCGAAAAAGCCTGACAGCAACATCAAGCAAAACAATAATGATGAA
DCP2-U1D-R1	TTCATCATTATTGTTTTGCTTGATGTTGCTGTCAGGCTTTTTCGAATT
DCP2-U1D-F2	ACTGTCGGGTTATCATCAACAACACTGGCGAATGATAAAAAAGCTTTT
DCP2-U1D-R2	AAAAGCTTTTTTATCATTCGCCAGTGTTGTTGATGATAACCCGACAGT
DCP2-ID-F	CCGTTTGCTAACAATAAGAATGTTAACAATAGTAATAGCGCTAACCCT
DCP2-ID-R	AGGGTTAGCGCTATTACTATTGTTAACATTCTTATTGTTAGCAAACGG
DCP2-ED1-F	CAGAGGCAAATAAAAAATGAAGATAAGGAGGAGCAGATTGATCCCGGT
DCP2-ED1-R	ACCGGGATCAATCTGCTCCTCCTTATCTTCATTTTTTATTTGCCTCTG
DCP2-ED2-F	TTGAAATTGTTGTTGGGTATCACTGCTAACAGTAATAATAATGCGGTC
DCP2-ED2-R	GACCGCATTATTATTACTGTTAGCAGTGATACCCAACAACAATTTCAA
DCP2-LD1-F	TACAGCAGCTCCTCCCCTGGGCAGAATTCGAAAAAGCCTGACAGCAAC
DCP2-LD1-R	GTTGCTGTCAGGCTTTTTCGAATTCTGCCCAGGGGAGGAGCTGCTGTA
DCP2-LD2-F	ACTGCTCATTCAAACTCTCAAGCTAAAAAACCAACATCATCGCAGAAG
DCP2-LD2-R	CTTCTGCGATGATGTTGGTTTTTTAGCTTGAGAGTTTGAATGAGCAGT
DCP2-LD3-F	TCCAATGTGTCTTCATCAAAAGATAGAAACCCAATTTCCTCTACTGTA
DCP2-LD3-R	TACAGTAGAGGAAATTGGGTTTCTATCTTTTGATGAAGACACATTGGA
DCP2-LD4-F	ATAAACGATGCGAATGCAAGCGAAAAACAAAAGGAAAAAGACATTACA
DCP2-LD4-R	TGTAATGTCTTTTTCCTTTTGTTTTTCGCTTGCATTCGCATCGTTTAT
DCP2-LD5-F	TCGCAGAAAAATTCAGCTAAAGGAAAAAAGAACGACTCTACCGGGTAC
DCP2-LD5-R	GTACCCGGTAGAGTCGTTCTTTTTTCCTTTAGCTGAATTTTTCTGCGA
DCP2-LD6-F	GAATTAGATAAGAATTCAACAGAGAAGCCCAAGCCTCTTAATGATGGG
DCP2-LD6-R	CCCATCATTAAGAGGCTTGGGCTTCTCTGTTGAATTCTTATCTAATTC
DCP2-LD7-F	TCAAATAAGGACAGTTCTCATGAACATGGTAATAAAAACAGCAGCGCC
DCP2-LD7-R	GGCGCTGCTGTTTTTATTACCATGTTCATGAGAACTGTCCTTATTTGA
DCP2-LD9-F	AATGGAACTTCAGGGTCTAATGAACATAGGAAGTGAAAGAATAAGTGT
DCP2-LD9-R	ACACTTATTCTTTCACTTCCTATGTTCATTAGACCCTGAAGTTCCATT
DCP2-LD9-F2	TCGAATGGAACTTCAGGGTCTAATGAACATAGGAAGTGAAAGAATAAGTGTTAT
DCP2-LD9-R2	ATAACACTTATTCTTTCACTTCCTATGTTCATTAGACCCTGAAGTTCCATTCGA
DCP2-LD8-F3	GCATCTGATAACAACGAAAATTCCTCAAATAAACAAAACAGGTCTAGTGCAATAAATGAGCCCAAC
DCP2-LD8-R3	GTTGGGCTCATTTATTGCACTAGACCTGTTTTGTTTATTTGAGGAATTTTCGTTGTTATCAGATGC
DCP2-F598	GATAAGATAGAATGGTTCGATTTT
DCP2-F1198	CCGAATCCGATGGCTTTTGGTGTT
DCP2-F1798	TCGACTCAGAGTAAACAGAATTCA
DCP2-F2398	AAACAAAAGGAAAAAGACATTACA
DCP2-R700	ACATTGATAAGGGTCTCATCATGG
DCP2-R1300	CAGAGTCCCTCGGTAAAGGAGCAG
DCP2-R1900	AACTGCTTTCGAAGACTTCATATG
DCP2-R2500	TCTTTTTCAAAATATTCAACAATC
DCP2-R3000	TTATTTATTTAGCAATGTATTTTA
DCP2-F1171	CCGGTCCCCCCTAATTTTAATGCTCCT
DCP2-F2047	ATAAACGAAACTGTCGGGTTATCATCA
DCP2-F2074	ACAACAAATACTGTAAAAAAGGTA
DCP2-F2557	TCAATGAAACGCAACGACGCTACAAAT
DCP2-R1551	ATTTGGTAAAAAGGAAGTATCTGGTTT
DCP2-R2556	CGTTGACATTTCACTTGACGGTCCACC
DCP2-R2964	TCGGCTGCCTTCATTTACAGTGTGTCT
DCP2-XbaI-F	GATCTCTAGAGCATCCTTGGTAAGAATATCTCCC
DCP2-NcoI-R	TACTCCATGGTCTAATGCGAAGGTACTTTTATTTTTTTC
DCP2-N210-E1-R	GATCGAATTCAATTTTCTTAAAATCGAACCATTCTATCTT
DCP2-TH-F1	GATCGGATCCATATGTCACTGCCGCTACGACACGCATTGGAG
DCP2-TH-C1	GATCGTCGACCCATGGTTACTCTTGGCTCGAGGGTACCTGTCCGTTGGA
DCP2-DS5	TGATTAACCTGGGGTTACCTAAAGAGAACA
DCP2-DS6	AATCCATCCAATTGGTTAAATAGGATCACA
YEL015W-1	AATTGCGGCCGCGGTCAACAGGTTGCTCGAAAAGAAGCA
YEL015W-4	AATTGTCGACGCTCAGTTCCTGTCTTCGTAGGATTGG
XRN1-DS5	CGCCACCGCAGAGCAAGTAACAACAGAGAC
XRN1-DS6	ACTGCCTCGAGTCTGACGATAGAAGACCCT
SKI2-DS1	ATTATCTTCAACGACTGAGAAGAATGAGCA
SKI2-DS4	AATACCATTTTCGCCTATCTTACCGACAGT
SKI7-atg-up500	AACTGGATATTGTAGCGCCTAGCGTCCTCA
SKI7-TAA-down500	AGAAACTGTACAAGACGAAGTAAAACATTA
PAT1-DS5	AATTTATCGGCTAACAACTGTGACAGTTGC
PAT1-DS6	TGTAACCCACCACACATGCCATGGTGATCG
SCD6-TH-F1	GATCGAATTCATGTCGCAGTACATCGGTAAAACTATTTCT
SCD6-TH-C1	GATCGTCGACTTAAAATTCAACGTTGGAAGGAGGTTGCGA
SCD6-DS5	CAGACTCTAGAGTTAACATTGATGATATGCT
SCD6-DS6	GCCGAATATCGCTAGCTTCGAAGTTATGTAA
CYH2-NotI-F	GATCGCGGCCGCATGCCTTCCAGATTCACTAAGACTAGAAAG
CYH2-SalI-R	GATCGTCGACTTAAGCGATCAATTCAACAACACCACCAGC
XRN1-DS3A	AAAAAGATCTGAATTCAACATACGACTAAAAACGAAGTATATT
XRN1-DS4	AAAAGTCGACAGAAGACCCTGCAATAACATTTACACA
XRN1-5'-BamHI-F	CCCTGCTAGCGGATCCATATGGGTATTCCAAAATTTTTCAGGTACA
XRN1-5'-SacI-R	TCTGAATCTACGAGCTCTTTGTTGATTCAT
