# Supplementary material for: Dcp2 C-terminal cis-binding elements control selective targeting of the decapping enzyme by forming distinct decapping complexes
Source: eLife. 2022 May 23;11:e74410. doi: 10.7554/eLife.74410 (PMC9170289; doi:10.7554/eLife.74410)
Supplement: Supplementary file 4. [file elife-74410-supp4.xlsx]

## Sheet: Sheet1
Supplementary file 4. Sequences of DNA probes used in this study
CYH2
gcggccgcatgccttccagattcactaagactagaaagcacagaggtcacgtctcaggtatgtagttccatttggaagag ggaatgaaagaaccaagacggtgactttttttttagtgttgtgcaaccaatatgtcgtgtgtatatcatggtacaggaga atgtcaatcagctaagtgtactcaacatatttctttgtgttttgattgcgaactttgtattaccatctcactgttgagac ggcttatttgaggtaatagctcgagtaaatgtactcttccatcgcaaactgagcaaaaagaaagtgtgcatagcctttgt catacttctcctttattataccatgatattcagaacagtcatactgtctactcattttacggctataaaaggtaa…
CAN1
ggatccagtttttaatctgtcgtcaatcgaaagtttatttcagagttcttcagacttcttaactcctgtaaaaacaaaaa
aaaaaaaaggcatagcaatgacaaattcaaaagaagacgccgacatagaggagaagcatatgtacaatgagccggtcaca
accctctttcacgacgttgaagcttcacaaacacaccacagacgtgggtcaataccattgaaagatgagaaaagtaaaga
attgtatccattgcgctctttcccgacgagagtaaatggcgaggatacgttctctatggaggatggcataggtgatgaag
atgaaggagaagtacagaacgctgaagtgaagagagagcttaagcaaagacatattggtatgattgcccttggtggtact
attggtacaggtcttttcattggtttatccacacctctgaccaacgccggcccagtgggcgctcttatatcatatttatt
tatgggttctttggcatattctgtcacgcagtccttgggtgaaatggctacattcatccctgttacatcctctttcacag
ttttctcacaaagattcctttctccagcatttggtgcggccaatggttacatgtattggttttcttgggcaatcactttt
gccctggaacttagtgtagttggccaagtcattcaattttggacgtacaaagttccactggcggcatggattagtatttt
ttgggtaattatcacaataatgaacttgttccctgtcaaatattacggtgaattcgagttctgggtcgcttccatcaaag
ttttagccattatcgggtttctaatatactgtttttgtatggtttgtggtgctggggttaccggcccagttggattccgt
tattggagaaacccaggtgcctggggtccaggtataatatctaaggataaaaacgaagggaggttcttaggttgggtttc
ctctttgattaacgctgccttcacatttcaaggtactgaactagttggtatcactgctggtgaagctgcaaaccccagaa
aatccgttccaagagccatcaaaaaagttgttttccgtatcttaaccttctacattggctctctattattcattggactt
ttagttccatacaatgaccctaaactaacacaatctacttcctacgtttctacttctccctttattattgctattgagaa
ctctggtacaaaggttttgccacatatcttcaacgctgttatcttaacaaccattatttctgccgcaaattcaaatattt
acgttggttcccgtattttatttggtctatcaaagaacaagttggctcctaaattcctgtcaaggaccaccaaaggtggt
gttccatacattgcagttttcgttactgctgcatttggcgctttggcttacatggagacatctactggtggtgacaaagt
tttcgaatggctattaaatatcactggtgttgcaggcttttttgcatggttatttatctcaatctcgcacatcagattta
tgcaagctttgaaataccgtggcatctctcgtgacgagttaccatttaaagctaaattaatgcccggcttggcttattat
gcggccacatttatgacgatcattatcattattcaaggtttcacggcttttgcaccaaaattcaatggtgttagctttgc
tgccgcctatatctctattttcctgttcttagctgtttggatcttatttcaatgcatattcagatgcagatttatttgga
agattggagatgtcgac
ADE2
agatctgaattaattcggattcatgcttatgggttagctatttcgcccaatgtgtccatctgacattactattttgcatt
ttaatttaattagaacttgactagcgcactaccagtatatcatctcatttccgtaaataccaaatgtattatatattgaa
agcttttgaccaggttattataaaagaaacttcatgctcgaaaaagatcatttcgaaaagttgcctagtttcatgaaatt
ttaaagcagtttatataaattttaccttttgatgcggaattgactttttcttgaataatacataacttttcttaaaagaa
tcaaagacagataaaatttaagagatattaaatattagtgagaagccgagaattttgtaacaccaacataacactgacat
ctttaacaacttttaattatgatacatttcttacgtcatgattgattattacagctatgctgacaaatgactcttgttgc
atggctacgaaccgggtaatactaagtgattgactcttgctgaccttttattaagaactaaatggacaatattatggagc
atttcatgtataaattggtgcgtaaaatcgttggatctctcttctaagtacatcctactataacaatcaagaaaaacaag
aaaatcggacaaaacaatcaagtatggattctagaacagttggtatattaggagggggacaattgggacgtatgattgtt
gaggcagcaaacaggctcaacattaagacggtaatactagatgctgaaaattctcctgccaaacaaataagcaactccaa
tgaccacgttaatggctccttttccaatcctcttgatatcgaaaaactagctgaaaaatgtgatgtgctaacgattgaga
ttgagcatgttgatgttcctacactaaagaatcttcaagtaaaacatcccaaattaaaaatttacccttctccagaaaca
atcagattgatacaagacaaatatattcaaaaagagcatttaatcaaaaatggtatagcagttacccaaagtgttcctgt
ggaacaagccagtgagacgtccctattgaatgttggaagagatttgggttttccattcgtcttgaagtcgaggactttgg
catacgatggaagaggtaacttcgttgtaaagaataaggaaatgattccggaagctttggaagtactgaaggatcgtcct
ttgtacgccgaaaaatgggcaccatttactaaagaattagcagtcatgattgtgagatctgttaacggtttagtgttttc
ttacccaattgtagagactatccacaaggacaatatttgtgacttatgttatgcgcctgctagagttccggactccgttc
aacttaaggcgaagttgttggcagaaaatgcaatcaaatcttttcccggttgtggtatatttggtgtggaaatgttctat
ttagaaacaggggaattgcttattaacgaaattgccccaaggcctcacaactctggacattataccattgatgcttgcgt
cacttctcaatttgaagctcatttgagatcaatattggatttgccaatgccaaagaatttcacatctttctccaccatta
caacgaacgccattatgctaaatgttcttggagacaaacatacaaaagataaagagctagaaacttgcgaaagagcattg
gcgactccaggttcctcagtgtacttatatggaaaagagtctagacctaacagaaaagtaggtcacataaatattattgc
ctccagtatggcggaatgtgaacaaaggctgaactacattacaggtagaactgatattccaatcaaaatctctgtcgctc
aaaagttggacttggaagcaatggtcaaaccattggttggaatcatcatgggatcagactctgacttgccggtaatgtct
gccgcatgtgcggttttaaaagattttggcgttccatttgaagtgacaatagtctctgctcatagaactccacataggat
gtcagcatatgctatttccgcaagcaagcgtggaattaaaacaattatcgctggagctggtggggctgctcacttgccag
gtatggtggctgcaatgacaccacttcctgtcatcggtgtgcccgtaaaaggttcttgtctagatggagtagattcttta
cattcaattgtgcaaatgcctagaggtgttccagtagctaccgtcgctattaataatagtacgaacgctgcgctgttggc
tgtcagactgcttggcgcttatgattcaagttatacaacgaaaatggaacagtttttattaaagcaagaagaagaagttc
ttgtcaaagcacaaaagttagaaactgtcggttacgaagcttatctagaaaacaagtaatatataagtttattgatatac
ttgtacagcaaataattataaaatgatatacctattttttaggctttgttatgattacatcaaatgtggacttcatacat
agaaatcaacgcttacaggtgtccttttttaagaatttcatacataagatct
TRP1
atgtctgttattaatttcacaggtagttctggtccattggtgaaagtttgcggcttgcagagcacagaggccgcagaatg
tgctctagattccgatgctgacttgctgggtattatatgtgtgcccaatagaaagagaacaattgacccggttattgcaa
ggaaaatttcaagtcttgtaaaagcatataaaaatagttcaggcactccgaaatacttggttggcgtgtttcgtaatcaa
cctaaggaggatgttttggctctggtcaatgattacggcattgatatcgtccaactgcatggagatgagtcgtggcaaga
ataccaagagttcctcggtttgccagttattaaaagactcgtatttccaaaagactgcaacatactactcagtgcagctt
cacagaaacctcattcgtttattcccttgtttgattcagaagcaggtgggacaggtgaacttttggattggaactcgatt
tctgactgggttggaaggcaagagagccccgaaagcttacattttatgttagctggtggactgacgccagaaaatgttgg
tgatgcgcttagattaaatggcgttattggtgttgatgtaagcggaggtgtggagacaaatggtgtaaaagactctaaca
aaatagcaaatttcgtcaaaaatgctaagaaatag
YRA1
agatctaaaaatctccctcgttctatttgaaactttaagaaatccatattaagaaaatacctacatctgctaaatgtctg
ctaacttagataaatccttagacgaaatcattggctctaacaaagcaggaagtaatagagcccgtgtcggtggtactcgt
ggtaacggtccaagaagagttggtaagcaagttggtagccaacgtaggagccttccaaacagaagaggccctatcagaaa
aaatactagggcacctccaaacgcagtcgctagagttgccaagctcttggacaccactagagaggtcaaggtcaacgtcg
aaggtttgccaagggacattaagcaggatgctgtaagagtatgttaatacgtgaaatgagagctatttgtttagttactc
gcatcgtctcgtgtggatacgagaaatattctttgtaaggaaggatatggcacacgcttttgatcaagaattctcttttt
agagatgaagaaagagtccgaaatacttcgctagagaaaatacaaaaagagtatcgttttcataagccaaccataccaat
ttttttcaatacttcaaatcatggcctataaggttggaattaccagctaccactgagaatgggtttgttcttattggctg
ggttaactcaaatcaatctgactatctgctaatctgtcaatcttacatttttaagctggcgtattgtgtcgcctcgaccg
tgatagttagttcctatttttaataagcgtatcatccaatactgaagttgtggaaggatcaattaattttgtatcctttc
aagagggagtagctttcagtttcgaatggcaccattttcaaaaaatagctatgggaaacatgtctttcatgaacgttcga
aaagatatgagtgcatcgcttcatttttttattatgatagttacaaaaatatttgatttgagacacctaatgaaaccaaa
gaggaactcacccatcgtggtacatgtttatttgagggtttatttttcctacgcaatggtatacttttaatactctcaac
tccttgattgtttgtgtattgtcccttccttctttgattttatatcatagagatatatgactaacttttttttttttatt
ataggaattttttgcatctcaagtaggtggtgttcaaagagttttgttgagttataacgaaaggggccaatctactggta
tggctaacatcacattcaaaaacggtgaattggccagaagggctgttgaaagatttaacggctctccaatcgatggaggc
agatcaagattgagacttaacctaatcgttgatccaaaccaacgcccagtcaaaagtttagccgacaggatcaaggctat
gccacaaaaaggcggaaacgctccaagaccagtaaagaggggtccaaatagaaaagctgctatggcaaaatcccaaaaca
aaccaaagagagaaaagcctgctaagaaaagtcttgaagatct
RPS28B
gctagcatggattctaagaccccagtcaccttagctaaagtcatcaaagttttaggccgtaccggttctcgtggtggtgttaccca
agttcgtgttgagttcttggaagacacttcccgtaccattgtcagaaatgtcaagggtccagttagagaaaacgacattt
tggtcttgatggaatctgaacgtgaagctcgtcgtttgcgttaaaggtatattaaaaaatttactattggtgctcttcga
gcattgttttttttctatatttacaaacaacagcttattttttaatatttctcaaaaaatgaagttcgaatgattatttt
aattgagtttagtgatgaaatcgattgcaaataatataaacgttggtaagctcatctaaacaatcgaaaggagggataga
agacagtaggtgtttgtgctttggtcggtttttccattcggtgaattcatacatctcctttattaattttaatggattct
ttacaagggattttcggttgccaaaaacagagaacaaatgcgtagaaatactcaatgatgtcaatttttcaaaaaatgaa
ttaaatgattgaagtcacttaatttttgtggttttttggaggtgggttgagtgtacaactcactataattgatgagatat
tcgacgaacttgttacttttttggattccagaatgtttactgaattttaagaattaattaatttgaggctaacctgtatg
gcatggaataacgaatcgacaagaagtctcttactgtaactttctttttttttggtgcatctatcgttaaatacaattta
aatattacattcatgtacttactcaatataataatctgattacttcatacaatagaagagaaagaaacagtctctaaaac
tgctgtcataacgcgt
EDC1
atgtcgacggataccatgtatttcaacagctccaggctgttgccatcggctggcaggaacaagacaaataatctaatcaa
acaaaaaactagaaataatcgtgcgaggggaaatgctgctaagaacgccaataataacaactatatcacagatataccac
ctcctcaaactcttcctaacggtcagaaacctaacttcggccattcttccaacaagaaaccatcatttaatcaaaagaag
cactctccaccttcttccccttcctctacaactactttaggtaaaaaaaacagacagaataataaagaaacgccacgaca
gaacaacaaagatgatactcgtttactgagtcagaacctaaagaatctgcttctgaaccagaaacaatccccgcatggct
ctcaagggataataccaatgggttgtaatggcagtgccaaaaaactcagtcactcttatgcaggctccactttcgccact
aatggtccaagggaggctaaaaacttgcccaaaccaagtt
SDS23
atgcctcaaaatacaagacacacgtccatcgtagaaatgctttctaccccacctcaattaccgaattccacagatttaaa
tagtttgagcgaacagacagacaagaacactgaagcaaacaaaagcgacacagaatcactacataaatctatttcgaaat
cgtcatcttcatcttctctctccacgctggataacacggaatactcaaacaataatggcaactccttgtccaccttgaat
tcacagaatctgttatctgttcataggcaggagtggcaacacactcctctgtcaaatttggtggaacagaacaaattgat
tttcatcagaggttctatttccgtagaggaagcattcaacacgctggtcaagcaccagctaacgtctttgcctgtggaga
attttccgggagacatgaattgtttaacattcgactataatgatctcaatgcgtaccttcttcttgtattaaacaggatc
aaggtgagcaacgacaagat
HXT6
atgtcacaagacgctgctattgcagagcaaactcctgtggagcatctctctgctgttgactcagcctcccactcggtttt
atctacaccatcaaacaaggctgaaagagatgaaataaaagcttatggtgaaggtgaagagcacgaacctgtcgttgaaa
ttccaaagagaccagcttctgcctatgtcactgtctctattatgtgtatcatgatcgcctttggtggtttcgttttcggt
tgggatactggtaccatttctggtttcatcaatcaaaccgatttcatcagaagatttggtatgaagcataaagatggtac
taattatttgtctaaggttagaactggtttgattgtctccattttcaacattggttgtgccattggtggtattattcttt
ccaaattgggtgatatgtacggtcgtaaggtgggtttgattgtcgttgttgtcatctacatcatcggtat
HSP12
atgtctgacgcaggtagaaaaggattcggtgaaaaagcttctgaagctttgaagccagactctcaaaagtcatacgctga
acaaggtaaggaatacatcactgacaaggccgacaaggtcgctggtaaggttcaaccagaagacaacaagggtgtcttcc
aaggtgtccacgactctgccgaaaaaggcaaggataacgctgaaggtcaaggtgaatctttggcagaccaagctagagat
tacatgggagccgccaagtccaagttgaacgatgccgtcgaatatgtttccggtcgtgtccacggtgaagaagacccaac
caagaagtaa
HSP26
agaggctacgcaccaagacgtcagttagcaaacacacccgcaaaggattctactggcaaggaagttgctagaccaaataa
ctatgctggcgctctttatgatcccagagatgaaaccttagatgattggttcgacaatgacttgtccctgttcccatctg
gtttcggtttccctagaagtgtcgcagttccagttgatattttggaccatgacaacaactacgagttgaaagtcgtggtt
cctggtgtcaaaagcaagaaggacattgatattgagtaccatcaaaacaagaaccaaattttggtttctggtgaaattcc
atctaccttgaatgaagagagtaaagacaaggtcaaggtcaaggagagcagctctggtaagttcaagagagtcatcactt
tgccagactacccaggtgtggatgcagacaacattaaagcagactacgcaaatggtgttttgacattaacagttccaaaa
ttgaagcctcagaaggatggtaagaaccacgtcaagaagattgaggtttcttctcaagaatcgtggggta
LSM3
atggagacacctttggatttattgaaactcaatctcgatgagagggtgtacatcaagctgcgcggggccaggacgctggt
gggcacactgcaagcgttcgactcacactgcaacatcgtgctgagtgatgcagtagagaccatataccaattaaacaacg
aggagttgagtgagtccgaaagacgatgtgaaatggtgttcatcagaggagacacagtgactctaatcagcacgccctct
gaagatgacgatggcgcagtggagatataa
BUR6
atggcagatcaagtaccagttacaacacaactaccaccaataaaacctgaacatgaggtaccacttgatgctggagggag
tccagtaggtaacatgggtaccaactcgaataacaacaacgagctaggtgatgtattcgacagaataaagacacacttcc
ctccggccaaggtaaagaaaataatgcagacagacgaggatataggaaaagtttcacaagccacgcccgtaatagcgggc
aggtccctagagttttttatagcgttattggtgaaaaaaagcggggagatggcaagaggacaaggaaccaagagaataac
cgccgaaatactaaaaaaaacaattttaaacgacgaaaaattcgatttcttaagggaaggtctatgcgtagaagaaggcc
aaacacaaccggaggaagagagtgcctga
DIF1
atggacgcacaactggaatgggcaagcagcctcgtcccaaagagacagcttcaacaacaacaacaacaacaggagcagca
gcagcagcagcaacaggatttccacaaggaccagttgatgactgtgggtatgcgaatcagacagcgggtcgaccagggtt
atgcatcgaggacgccgagcacctcggacgcttcactacagccgggtgtcattagagattactcgagcgttattgttccg
caatttacaaggtcgcccttgcccactgctaactcgctaccacctatgctgataaaccagagaacaatgtcgaccgaggc
gtcctcgctcgagaaatgggacgtcgcggaacctgccgcggagcacgaaacaatggttaatggatccaagagaagacttt
CHA1
atgtcgatagtctacaataaaacaccattattacgtcaattcttccccggaaaggcttctgcacaatttttcttgaaata
tgaatgccttcaaccaagtggctccttcaaaagtagaggaatcggtaatctcatcatgaaaagtgccattcgaattcaaa
aggacggtaaaagatctcctcaggttttcgctagttctggcggtaatgccggttttgctgctgcaacagcatgtcaaaga
ctgtctctaccatgtacagtcgtggttcctacagcgacaaagaagagaatggtagataaaatcaggaacaccggtgccca
ggttatcgtgagtggtgcctactggaaagaagcagatacttttttaaaaacaaatgtcatgaataaaatagactctcagg
tcattgagcccatttatgttcatcccttcgataatccggatatttgggaaggacattcatctatgatagatgaaatagta
caagatttgaaatcgcaaca
AGA1
atgacattatctttcgctcattttacctacctgttcacaatattgttgggattaactaatattgccttggcatctgatcc
agaaacgattctagtgacgataaccaagacaaacgatgcaaatggggttgttacaactacagtttcacccgcgctagtct
ccacatccactatcgttcaagctggcactacgacattgtatacgacttggtgtccattgacggtatccacttcatctgct
gccgaaataagtccttcaatatcgtacgctactaccctatccagatttagtactttgacattatctacagaagtctgctc
ccatgaggcatgtccttcgtcatcgacgttgccaaccaccaccttatctgtgacttccaagttcacttcatatatttgcc
ctacttgtcacacaaccgctatcagctcattatccgaagtaggaactacaaccgtggtatcatccagcgccattgaacca
tcaagtgcctctataatctc
CPA1
tatgattacagaattcaagatgttgcttctgaattcgacggtattttcttatccaatggaccaggcaacccagaactatg
ccaagctacaatttccaacgtcagggaattactaaataaccctgtttatgactgtatccctatttttgggatttgtctag
gccatcaactcttggctctggcctccggtgcctctactcacaaattgaaatatggtaatagggctcacaacatccctgcc
atggatttgactaccggccagtgccacattacatctcaaaatcatggctatgcagttgatcctgagaccctaccaaagga
ccaatggaaaccttattttgttaatttaaacgacaaatcaaacgaaggcatgatacaccttcaaagacccatattttcta
cccaatttcacccagaggcaaaaggtggtcccttagacacagctattctttttgacaaattcttcgataatatagaaaaa
taccaattacaatctcaggcaaaaagttcaatctcactaaaagtaacatacagtaccgataaatcgagattgcagagtat
aaatgttactaagttggccaaggaaagagtgttgttctaa
EST1
gaatgtgttctgcgaattagatcaataatattttctggcatgaaatttttagagaaaaatgacaccggcgtcatatggaa
tgccagcaaatataagtttgatttaataagcccaaatattaaaataaaacgccaaatagcattatcggaaatttcctcca
aaataaatgtaaaaacacaacaggaaagagtagtctcttcgagaaaagttgaggccaaaagagatgaacaacagcgcaaa
agagccgggaaaatagctgtgacagaactggaaaaacaatttgcaaatgtccggagaacaaaaaaattgtctccgctccc
agaaaaagatggcgtttcttctgagttggtaaaacatgctgcttcacgagggagaaaaactatcactggcccactatcct
ctgattttctctcatatccagacgaagcaattgatgctgatgaggacatcaccgtccaagtgccagatactcct
RPS9A
gagccccaagaacatattccaagacttactctaccccaaagagaccttacgaatcttctcgtttggacgcagaattgaag
ttggccggtgaattcggtttgaagaacaagaaggaaatttacagaatttccttccagttatctaagattcgtcgtgctgc
aagagacttgttgacaagagacgaaaaggacccaaagagattgttcgaaggtaatgctttgattaggagactagttagag
tcggtgttttatccgaagataagaagaagttagattatgttttagccttgaaggtcgaagatttcttggaaagaagattg
caaactcaagtctacaagctaggtttagccaagtctgtccaccatgcaagagttttaatcactcaaaggcacattgctgt
tggtaagcaaattgtcaacatcccctctttcatggtcagattggactctgagaagcacattgactttgctccaacatctc
cattcggtggtgctagaccaggcagagttgctagaagaaatgctgcaaggaaggcggaagcttctggtgaagctgctgat
gaagctgatgaggccgatgaagaataa
